# 1 **A universal pocket in Fatty acyl-AMP ligases ensures redirection of fatty acid** 2 **pool away from Coenzyme A-based activation**

3 Gajanan S. Patil<sup>1, 2#</sup>, Priyadarshan Kinatukara<sup>1#</sup>, Sudipta Mondal<sup>1</sup>, Sakshi Shambhavi<sup>1,2</sup>, Ketan D.

4 Patel<sup>1</sup>, Surabhi Pramanik<sup>1</sup>, Noopur Dubey<sup>1</sup>, Subhash Narasimhan<sup>1</sup>, Murali Krishna Madduri<sup>1</sup>, Biswajit

5 Pal<sup>1</sup>, Rajesh S. Gokhale<sup>3</sup>, Rajan Sankaranarayanan<sup>\*1,2</sup>.

6 <sup>1</sup>CSIR-Centre for Cellular and Molecular Biology, Uppal Road, Hyderabad, Telangana – 500007, India.

7 <sup>2</sup>Academy of Scientific and Innovative Research (AcSIR), Ghaziabad – 201002, India.

8 <sup>3</sup>National Institute of Immunology, Aruna Asaf Ali Marg, New Delhi – 110067, India.

9 #GSP and PK contributed equally to the work.

10 \* corresponding author email: [sankar@ccmb.res.in](mailto:sankar@ccmb.res.in)

## 11 **ABSTRACT**

12 Fatty acyl-AMP ligases (FAALs) channelize fatty acids towards biosynthesis of virulent lipids in  
13 mycobacteria and other pharmaceutically or ecologically important polyketides and lipopeptides in  
14 other microbes. They do so by bypassing the ubiquitous coenzyme A-dependent activation and rely  
15 on the acyl carrier protein-tethered 4'-phosphopantetheine (*holo*-ACP). The molecular basis of how  
16 FAALs strictly reject chemically identical and abundant acceptors like coenzyme A (CoA) and accept  
17 *holo*-ACP unlike other members of the ANL superfamily remains elusive. We show FAALs have plugged  
18 the promiscuous canonical CoA-binding pockets and utilize highly selective alternative binding sites.  
19 These alternative pockets can distinguish adenosine 3', 5'-bisphosphate-containing CoA from *holo*-  
20 ACP and thus FAALs can distinguish between CoA and *holo*-ACP. These exclusive features helped  
21 identify the omnipresence of FAAL-like proteins and their emergence in plants, fungi, and animals with  
22 unconventional domain organisations. The universal distribution of FAALs suggests they are parallelly  
23 evolved with FAALs for ensuring a CoA-independent activation and redirection of fatty acids towards  
24 lipidic metabolites.

## 25 INTRODUCTION

26 The ANL superfamily includes enzymes such as the Acyl/Aryl-CoA ligases (ACS or FACLs), Adenylation  
27 domains (A-domains) and Luciferases along with the recently identified Fatty acyl-AMP ligases (FAALs).  
28 These enzymes are involved in the production of both primary metabolites such as acyl-CoA and  
29 secondary metabolites such as antibiotics <sup>1</sup>, complex lipids <sup>2</sup>, cyclic peptides <sup>3</sup> and lipopeptides <sup>4,5</sup>. Basic  
30 metabolic pathways such as  $\beta$ -oxidation, membrane biogenesis, post-translational modifications etc.,  
31 use primary metabolites such as acyl-CoA. The secondary metabolites such as complex lipids that  
32 function as virulent molecules in *Mycobacteria* and bioactive molecules in several microbes that help  
33 tide over unfavourable conditions and establish themselves in their niches. Such diverse metabolites  
34 are produced by the members of the ANL superfamily through a two-step catalytic mechanism. It  
35 begins with the activation of carboxylate-moiety of substrates such as fatty acids or amino acids by  
36 ATP hydrolysis and finally transferring it to an acceptor such as CoA or *holo*-ACP. Multiple structural  
37 and biochemical studies show that members of the superfamily such as FACLs and A-domains employ  
38 a common pocket for the chemically identical CoA and the 4'-PPant moieties attached to the *holo*-  
39 ACP, respectively for the final transfer. It was later demonstrated that the A-domains can cross-react  
40 with CoA to form aminoacyl-CoA <sup>6</sup>, which points to the liabilities of utilizing a common pocket for  
41 binding chemically identical moieties. Infidelity towards the final acceptor has now been noted in  
42 different classes of ANL superfamily members where Luciferases are shown to catalyse fatty acyl-CoA  
43 formation <sup>7</sup> and FACLs producing bioluminescence with molecular oxygen <sup>8</sup>. While fatty acid/amino  
44 acid substrate promiscuity is well studied and exploited in combinatorial biosynthesis of bioactive  
45 molecules, the origin and basis of acceptor promiscuity is relatively less understood.

46 FAALs are atypical enzyme systems of the ANL superfamily as they completely lack acceptor  
47 promiscuity, where they transfer the activated fatty acyl-AMP to the 4'-PPant of *holo*-ACP <sup>9</sup> but not  
48 CoA. FAALs rejecting the small, diffusible, and abundant CoA while accepting the ACP-tethered to a 4'-  
49 PPant moiety (Supplementary Figure-1) is puzzling as they are chemically identical. In a previous study,  
50 it was proposed that the FAAL-specific insertion (FSI), an additional stretch of amino acids found only

51 in the N-terminal domain of FAALs, prevents reaction with CoA<sup>10</sup>. However, the deletion or  
52 destabilization of the FSI failed to convert FAALs as efficient producers of acyl-CoA as there is only a  
53 weak ability to react with CoA<sup>10,11</sup>. Moreover, it is also unclear how such a mechanism operates and  
54 distinguishes the two chemically identical acceptors, particularly when CoA is an abundant metabolite.  
55 These observations prompted us to hypothesize that FAALs have either evolved novel appendages or  
56 other modes for binding the acceptor to allow strict rejection of CoA.

57 In the present study, we have used structural, mutational, and biochemical analysis to identify the  
58 mechanistic basis of how FAALs can distinguish between near identical acceptors for the acyl transfer  
59 reaction. We show that, unlike other members of the superfamily, FAALs achieve acceptor fidelity by  
60 avoiding the usage of a promiscuous canonical CoA-binding pocket and utilizing a discriminatory  
61 pocket that is distinct from the canonical CoA-binding pocket. Loss- and gain-of-function mutations  
62 were generated by identifying the structural determinants that nullify the canonical CoA-binding  
63 pocket. Interestingly, we found that the non-functional canonical CoA-binding pocket and the unique  
64 discriminatory alternative pocket are unique features of FAALs which is also conserved in all forms of  
65 life including plant, fungi, and animals. The identification of such a conserved rejection mechanism  
66 across organisms has larger implications in determining the redirection of cellular flux of fatty acids  
67 towards synthesis of diverse metabolites across organisms.

## 68 **RESULTS AND DISCUSSION**

### 69 **The promiscuous canonical CoA-binding pocket is inaccessible and redundant in FAALs**

70 The structural features of a canonical CoA-binding pocket that allow the proper recognition of CoA/4'-  
71 PPant in different ANL superfamily members was compared and contrasted with the analogous  
72 structural positions in FAALs. A comprehensive analysis of the canonical CoA-binding pocket in the 26  
73 structures (59 protomers) of the CoA/4'-PPant-bound ANL superfamily members (Supplementary  
74 Table-1) revealed important aspects of CoA/4'-PPant recognition. It is observed that ligand interacts  
75 with the protein through three categories of interactions but none of the structures show the CoA/4'-

76 PPant ligands bound in identical positions or orientations. The three categories of interactions are; (i)  
77 the hydrogen bonds mediated by the A8-motif of the C-terminal domain (ii) the water-mediated  
78 contacts through (Supplementary Figure-2b) the N-terminal helices H10 and H14 (notation based on  
79 *Escherichia coli* FAAL abbreviated as *EcFAAL*; PDB ID: 3PBK)<sup>12</sup> and (iii) the interactions with the  
80 phosphates<sup>13-20</sup> of the adenosine 3',5'-bisphosphate moiety through of the positively charged residues  
81 (Arg/Lys) (Supplementary Figure-3a) in the loop connecting H23 and  $\beta$ 26 (notation based on *EcFAAL*).

82 A comparative analysis of the structurally analogous CoA-binding pocket of FAALs (11 structures  
83 constituting 23 protomers)<sup>10-12,21,22</sup> sheds light on why FAALs cannot accept CoA. The analysis reveals  
84 an absence of selection from the positively charged residues (Arg/Lys) known to assist in CoA binding  
85 in the other members of the ANL superfamily (Figure-1a). In addition, the CoA-binding pocket of FAALs  
86 shows the presence of bulky residues F279, W224 and M231 (in *EcFAAL*) at the base and a unique  
87 FAAL-specific helix (FSH) (T252-R258 in *EcFAAL*) at the entrance of the pocket (Figure-1b). These  
88 elements are highly conserved in other FAALs (Figure-1c) and restrict the space available for the  
89 incoming 4'-PPant arm of both CoA and *holo*-ACP. The superposition of CoA- and 4'-PPant-bound  
90 structures with FAALs revealed that the overcrowded pocket along with the FSH at the entrance of  
91 the pocket is unlikely to accommodate both CoA or 4'-PPant of *holo*-ACP and hinder their entry  
92 (Figure-1b). There are at least seven atoms of the N-terminal domain of FAALs at a distance less than  
93 2.5 Å from the atoms of CoA in its various conformations found in the different CoA-bound FAAL  
94 structures. On the contrary, the N-terminal domain of FAALs shows only one atom at 2.5 Å from the  
95 multiple CoA conformations (Supplementary table-II). The distance-based assessment clearly  
96 indicates the potential clashes an incoming CoA would face in the canonical pocket of FAALs.  
97 Moreover, the absence of positively charged residues will naturally be unfavourable for CoA from  
98 being appropriately oriented in the pocket. These observations lead to the hypothesis that the  
99 canonical CoA-binding pocket is rendered non-functional because of the inaccessibility in FAALs.

100 **Resurrecting the canonical CoA pocket enables gain of function in FAALs**

101 The structural analysis was used to design mutations in FAALs and FACLs where the bulkier residues  
102 of the canonical CoA-binding pocket of FAALs were mutated to smaller residues to induce "gain of  
103 function" (Figure-2a, 2b). Likewise, the smaller residues in the canonical CoA-binding pocket of FACLs  
104 were substituted with the corresponding conserved bulkier residues present in FAALs to measure the  
105 "loss of function" (Figure-2d, 2e). Individual mutations reducing the size of residues in the canonical  
106 CoA-binding pocket resulted in the production of acyl-CoA or "gain of function" in FAALs that  
107 otherwise does not make any acyl-CoA (Figure-2c). A considerable amount of the total acyl-AMP  
108 formed was converted to acyl-CoA, ~80% in the case of *MsFAAL32*<sub>Δ254-257</sub> and ~60% in the case of  
109 *RsFAAL*<sub>Δ240-243</sub>, when the FSH segment was deleted as compared to their wild-type proteins,  
110 respectively. Some of the single point mutants such as A253F in *MtFACL13* show reduced production  
111 of acyl-CoA by ~80%, while mutations in combinations such as A276F/A232M of *AfFACL* reduce the  
112 turnover of acyl-AMP to acyl-CoA by 98% as compared to wild-type (100%) (Figure-2f). These  
113 observations clearly indicate that the size of residues in the canonical CoA-binding pocket dictate the  
114 ability to accommodate CoA and hence the ability to facilitate the thioesterification reaction with CoA.

115 It was previously identified that deletion of FAAL-specific insertion (ΔFSI) can lead to gain of function  
116 in FAALs<sup>10</sup>. Current results indicate that mutations in the canonical pocket alone is sufficient to  
117 introduce CoA production ability in FAALs. A comparison of acyl-CoA production of the ΔFSI with FSH  
118 deletion mutant (ΔFSH) (Figure-2g) reveals that *RsFAAL*<sub>ΔFSH</sub> produces 2-fold excess acyl-CoA as  
119 compared to *RsFAAL*<sub>ΔFSI</sub> while *MsFAAL32*<sub>ΔFSH</sub> produces 10-fold excess acyl-CoA as compared to  
120 *MsFAAL32*<sub>ΔFSI</sub> (Figure-2h). Therefore, it can be concluded that the FSH and other CoA- rejection  
121 elements around the canonical CoA-binding pocket significantly deter acyl-CoA production, which  
122 supersedes the inhibition of acyl-CoA production by FSI in FAALs. Overall, these observations lead to  
123 the conclusion that the available space in the canonical CoA-binding pocket of FAALs is very small to  
124 accommodate even the 4'-PPant moiety. Mutations that increase the pocket space enhance the acyl-  
125 CoA production in FAALs, while the opposite is observed in the case of FACLs. Therefore, the bulky  
126 residues in the putative canonical CoA-binding pocket of FAALs itself acts as a negative selection gate

127 to sterically exclude CoA. The rejection mechanism operational at the canonical CoA-binding pocket  
128 in FAALs is relatively more effective in rejecting CoA than the FSI-based rejection.

### 129 **Identification of an alternative 4'-PPant-binding pocket in FAALs**

130 The steric occlusion of the 4'-PPant binding in canonical pocket would not only result in prevention of  
131 CoA-binding but also restrict the access to the 4'-PPant tethered *holo*-ACP. Previous studies have  
132 highlighted that FAALs work in coordination with *holo*-ACP's, stand-alone or fused to polyketide  
133 synthase (PKS) or nonribosomal peptide synthetase (NRPS) modules, to produce various bioactive  
134 molecules such as complex lipids of *Mycobacterium*, lipopeptides of *Ralstonia* and other  
135 cyanobacterial species. Since the canonical pocket is rendered inaccessible, it immediately prompts  
136 the question 'how then FAALs are able to transfer the activated fatty acids to the 4'-PPant arm of the  
137 *holo*-ACP? We, therefore, sought to identify if FAALs have evolved an alternative mechanism to  
138 accommodate the 4'-PPant arm to allow binding and subsequent catalysis. Analysis of the crystal  
139 structures of the N-terminal domains of FAALs using various pocket search algorithms such as MOLE  
140 2.0<sup>23</sup>, DOGSiteScorer<sup>24,25</sup>, PyVOL<sup>26</sup>, KVFinder<sup>27</sup> and POCASA<sup>28</sup> helped us in identifying a novel cavity  
141 in the N-terminal domain of FAALs (Figure-3a) but not identifiable in any of the known crystal  
142 structures of FAALs.

143 The entrance of the distinct tunnel is on the N-terminal side of the FSH, while the canonical pocket to  
144 accommodate CoA is on the C-terminal side of the FSH. The approach towards the active site in both  
145 cases is not on the same plane, but they coincide near the active site near the  $\beta$ -alanine of the 4'-  
146 PPant. The longest length along this pocket is aligned at  $\sim 25^\circ$  to the canonical CoA-binding pocket. The  
147 canonical pocket is mainly formed after the rotation of the C-terminal domain in the thioesterification  
148 state (T-state) bringing the A8-motif near the active site. The space generated between the A8-motif  
149 (from the C-terminal domain) and the subdomain-B of the N-terminal domain constitute the canonical  
150 CoA-binding pocket. In contrast, the newly identified pocket is the space between the loops in  
151 subdomain-A and the FSH region of subdomain-B of FAALs. These loop regions are highly variable in

152 length but rich in prolines (occasionally threonine or serine) some of which are conserved in FAALs  
153 such as P226 and P107 in *EcFAAL* (Figure-3b), while the FSH has a unique secondary structure  
154 characteristic of FAALs. The structurally analogous sites in FAALs show a high degree of variability with  
155 occasional prolines but the frequency of prolines at the indicated positions is poor and often replaced  
156 by Asn/Leu (Supplementary Figure-4). The ability to consistently identify the tunnel with regions  
157 enriched in prolines around the opening led to the proposition that this alternative pocket is perhaps  
158 a universal attribute of FAALs that has evolved to accommodate the 4'-PPant arm.

### 159 **The alternative pocket in FAALs is functional and accepts a 4'-PPant-tethered ACP**

160 The ability of the alternative pocket to accommodate 4'-PPant arm tethered to ACP was tested using  
161 structure-guided mutagenesis. Bulkier residues (Phe/Arg) were introduced at the entrance of the  
162 tunnel that could potentially block the accessibility of the pocket for the incoming 4'-PPant arm. The  
163 biochemical analysis of these mutants requires an assay system to monitor the transfer of acyl-AMP  
164 to the 4'-PPant arm of *holo*-ACP. Typically, such acyl-transfers are assessed using SDS-PAGE<sup>9,29</sup> or  
165 conformationally sensitive Urea-PAGE (CS-PAGE)<sup>30</sup>. The ACPs that accept the acyl-chain from FAALs  
166 presented multiple complications such as poor conversion from *apo*-ACP to *holo*-ACP (Supplementary  
167 Figure-5a) and lack of separation on a CS-PAGE (Supplementary Figure-5b). Therefore, the CS-PAGE  
168 assay was modified for enhanced detection of the FAAL-dependent acyl-transfer on *holo*-ACP for the  
169 first time using the radio-labelled fatty acids. We tested the efficacy of the modified radio-CS-PAGE  
170 assay to probe three pairs of FAAL-ACP systems from diverse organisms (Figure-4a), viz FAAL-ACP pairs  
171 from *E. coli* (*EcFAAL-EcACP*), *Myxococcus xanthus* (*MxFAAL-MxACP*) and *Ralstonia solanacearum*  
172 (*RsFAAL-RsACP*). The appearance of bright bands on the radio-CS-PAGE indicates that the  
173 radiolabelled fatty acid tethered to ACP, which is absent when *apo*-ACP is used, or ATP is omitted in  
174 the reaction. Thus, the assay system can enable the simultaneous probing of multiple FAAL-ACP pairs  
175 along with their mutations and facilitate similar studies in the future.

176 The modified radio-CS-PAGE was then used to test if mutating prolines (occasionally a threonine)  
177 guarding the entrance of the pocket to bulkier residues can cause abrogation of the acyl-transfer  
178 activity (Figure-4c). It was found that a single point mutation, T83F or T83R, T252F or T252R and P107F  
179 or P107R in *EcFAAL* can almost abrogate the acyl-transfer reaction on *holo-EcACP* (Figure-4c). It should  
180 be noted that these mutations did not affect the adenylation ability of the proteins (Figure-4d). The  
181 mutations in other FAAL-ACP pairs, *MxFAAL-MxACP* and *RsFAAL-RsACP* also resulted in abrogation of  
182 the acyl-transfer ability on their respective cognate *holo*-ACPs. An additional FAAL-PKS pair of  
183 *MsFAAL32-MsPKS13<sub>1-1042</sub>* was also mutated and probed biochemically using the traditional radio-SDS-  
184 PAGE. The mutations of residues guarding the alternative pocket to bulkier residues in the *MsFAAL32*-  
185 *MsPKS13<sub>1-1042</sub>* system also resulted in diminished acyl-transfer ability. These results indicate that  
186 blocking the entrance of the alternative pocket prevents the entry of the incoming 4'-PPant arm  
187 tethered to ACP. Therefore, in FAALs, the identified alternative pocket is fully functional and distinct  
188 from the non-functional canonical pocket. Such a unique pocket facilitates the entry of the 4'-PPant  
189 arm of the ACP to approach the active site and catalyse the acyl-transfer reaction, a feature absent in  
190 the other members of the superfamily.

#### 191 **A universal mechanism for rejection of highly abundant CoA in the alternative pocket**

192 The primary attribute of a functional alternative pocket in FAALs is to discriminate and reject CoA from  
193 the chemically identical 4'-PPant of *holo*-ACP. Therefore, the pocket should allow the 4'-PPant entry  
194 into the tunnel but not the additional "head group", adenosine 3',5'-bisphosphate moiety of CoA.  
195 Structural analysis of 8 CoA-bound protein structures (constituting 14 protomers) of the ANL  
196 superfamily reveals the variability or degrees of freedom available for adenosine 3',5'-bisphosphate  
197 moiety (head group). The analysis reveals that the 4'-PPant arm remains largely rigid in an extended  
198 form and the major source of variability is the conformational freedom around the 4'-phosphate  
199 (Supplementary Figure-6a). Such a variability has previously been used to classify the conformations  
200 of CoA as extended conformations (e.g.: *StACS*, *HsFACL*) or bent conformations (e.g.: *Aa4'-CBL*)<sup>31</sup>.  
201 Limited variabilities in the conformations of the adenine ring and ribose are clustered in a small zone



202 and therefore can be ignored (Supplementary Figure-6a). The length of the 4'-PPant arm is around 18-  
203 20 Å<sup>32</sup> while it is around 15-16 Å<sup>17</sup> as seen in the crystal structures of various ANL superfamily  
204 members, which is comparable to the length of predicted pockets (17-18 Å). The biochemical evidence  
205 (Figure-4c) along with length considerations indicates that the 4'-PPant arm can be accommodated  
206 within the predicted pocket. In the absence of structural information, the orientation of the 4'-PPant  
207 arm is random but limited to space with the identified pocket such that the 4'-phosphate is at the  
208 entry of the tunnel and the thiol near the active site.

209 Based on the above considerations, a CoA molecule in ANL superfamily members can be visualized as  
210 "flag hoisted on a mast". The extended 4'-PPant arm can be considered as the "mast" and the  
211 adenosine 3',5'-bisphosphate moiety as the "flag". The rotation of the "flag" around the "mast" placed  
212 within the pocket is comparable to the degree of freedom available for the "flag" (Supplementary  
213 Figure-6b). We, therefore, rotated the "flag" around the "mast" to generate conformations at an  
214 angular sampling rate of 1° per conformation for each of the four known conformations of CoA (Figure-  
215 5a). It was found that main-chain atoms and C $\beta$  atoms of the FAAL protein, irrespective of the  
216 conformation of the C-terminal domain (A-state or T-state), show an average of 28 clashes (van der  
217 Waals overlap > 0.25 Å) (Figure-5b). The adenosine 3',5'-bisphosphate or the "flag", would encounter  
218 severe clashes because the entry of the alternative pocket is deeply embedded within the subdomain-  
219 A and B of the N-terminal domain. It is unlike the entry of the canonical pocket, which is entirely open  
220 with the subdomain-B forming the base of the pocket (Figure-4). Therefore, the N-terminal domain of  
221 FAALs itself forms a strong deterrent for accommodating adenosine 3',5'-bisphosphate and hence  
222 prevents CoA binding. Interestingly, the structural elements resisting the adenosine 3',5'-  
223 bisphosphate are unique to FAALs such as the FSH (T252-R258 in *EcFAAL*) and the loop harboring  
224 proline residues that guard the opening of the tunnel. Therefore, a strong negative selection and the  
225 absence of any positive selection make accommodation of adenosine 3',5'-bisphosphate containing  
226 CoA unlikely. In contrast, the adenosine 3',5'-bisphosphate lacking 4'-PPant of *holo*-ACP can easily

227 access the pocket and participate in the acyl-transfer reaction. This essentially forms the structural  
228 basis for the CoA-rejection mechanism in FAALs (Figure-5c).

### 229 **Identification of FAAL-like proteins across different forms of life**

230 Previous studies show that FAALs can be identified based on the presence of insertion and its  
231 anchorage to the N-terminal domain through hydrophobic interactions. A lack of sequence  
232 conservation in the FSI and only a single structural template for further analysis complicated the  
233 search procedure. Therefore, early genome mining efforts resulted in a sparse identification of FAALs  
234 in lineages of actinobacteria, cyanobacteria and proteobacteria along with some eukaryotes such as  
235 humans and mouse <sup>11</sup>. The conserved sequence features from this study such as FSH, a blocked  
236 canonical pocket and a proline-lined 4'-PPant binding pocket led to the identification of FAAL-like  
237 proteins with greater confidence. The analysis revealed a ubiquitous distribution of FAALs across  
238 different forms of life including bacteria, plants, fungi, and animals, except archaea (Figure-6a). The  
239 phylogenetic analysis reveals that all the FAAL-like proteins diverge and cluster away from FACs or A-  
240 domains. FAAL-like proteins show three sub-groups, viz. bacterial/plant FAALs group, fungal FAAL-like  
241 protein group and animal FAAL-like protein group (Figure-6a). Typical FAALs are bacterial FAALs, which  
242 are always found in a genomic context with PKS and PKS/NRPS hybrid genes either as a stand-alone  
243 domain or as a didomain fused to ACP or multidomain fused to the entire PKS/NRPS gene.  
244 Occasionally, the stand-alone bacterial FAALs are found to be interspersed with additional domains,  
245 mainly with dehydrogenases and oxygenases (Supplementary Figure-8b). Most plant FAAL-like  
246 domains resemble the bacterial FAALs from their sequence identity and domain organization.  
247 However, unique domain organizations are also found in plant FAAL-like domains, where an  
248 uncharacterized protein has FAAL-like domains sandwiched between HemY domains and catalase  
249 domains or amino acid oxidase domains (Supplementary Figure-8b). To the best of our knowledge,  
250 this is the first report of the presence of FAAL-like domains in plants and also the fusion of alternate  
251 domains to FAALs at their N-terminus.

252 Fungal and animal FAAL-like domains tend to cluster together with bacterial/plant FAAL-like domains  
253 in bioinformatic analysis (Figure-6a) because of the conservation of unique FAAL-specific features.  
254 Despite their lower sequence identity, the FSI (Supplementary Figure-8b, 10c) supported by a  
255 hydrophobic patch and the FSH and CoA-rejecting features (Supplementary Figure-9a, 11b) are clearly  
256 identifiable. Such conserved FAAL-specific features indicate that FAAL-like modules are recruited in  
257 eukaryotes for specific metabolic processes owing to their unique ability to reject CoA. Interestingly,  
258 fungal and animal FAAL-like domains share a highly conserved three-domain architecture, and such  
259 an architecture is not seen in any of the prokaryotes and plants (Supplementary table-III). The  
260 conserved three-domain protein consists of a N-terminal DMAP1-binding domain followed by a  
261 tandemly fused two FAAL-like domains as found in Fungi to Animals. The eukaryotic metabolic context  
262 for avoiding a reaction with CoA through these FAAL-like domains and their unique domain  
263 organization remains to be explored. Based on these observations, FAAL-like domains are more wide-  
264 spread than previously anticipated and their omnipresence is comparable to the universally present  
265 FAALs. Therefore, we propose that FAALs may not have descended from FAALs and they rather share  
266 a parallel evolutionary history. The ancestral ANL fold could have diverged as non-promiscuous FAAL-  
267 like members and promiscuous nonFAAL-like members simultaneously in the last universal common  
268 ancestor (Figure-6b).

## 269 **CONCLUSIONS**

270 The study uncovers the mechanistic basis of how FAALs strictly reject CoA, which is highly abundant  
271 and almost chemically identical to their actual substrate, *holo*-ACP. The rejection mechanism relies on  
272 a discriminatory 4'-PPant-accepting pocket while avoiding the promiscuous canonical CoA-binding  
273 pocket that is rendered non-functional. It has been achieved through bulky hydrophobic residues in  
274 the pocket and a unique secondary structural element, FSH at the entrance. The discriminatory 4'-  
275 PPant accepting pocket in FAALs, on the other hand, has a unique architecture that negatively selects  
276 adenosine 3', 5'-bisphosphate moiety and also lacks Arg/Lys residues for positive selection.

277 Interestingly, these rejection criteria are not only conserved in bacteria but also in all forms of life  
278 (excluding archaea). The unique remodelling of pockets to ensure acceptor discrimination probably  
279 allowed the evolutionary recruitment of FAAL-like domains in metabolic crossroads for redirecting the  
280 fate of molecules to specific pathways. Such a wide-spread conservation of FAAL-like proteins puts  
281 the evolutionary origin of FAALs parallel with FACLs in the last universal common ancestor and not as  
282 a subset of FACLs.

283 The scaffold of the ANL superfamily of enzymes is known to be promiscuous not only for the substrates  
284 they act on<sup>33</sup> but also the final acceptor of the acyl adenylates. Surprisingly, billions of years of  
285 evolution has not prevailed upon the substrate-promiscuity problem as well as the acceptor-  
286 promiscuity problem. The probability of acceptor-promiscuity influencing the erroneous product  
287 formation is high as some of the acceptors such as CoA and pantetheine are the most abundant  
288 molecules in the cell. The problem is greatly amplified as it can redirect the fate of metabolites from  
289 one pathway to another such as primary metabolism to secondary metabolism. Our analysis shows  
290 that none of the solved CoA-bound structures of ANL superfamily members, even the protomers of  
291 the same crystal (e.g., *SeFACL*), exhibit conformity in the binding mode of 4'-PPant or the adenosine  
292 3',5'-bisphosphate moiety<sup>15,34</sup>. The variability in the 4'-PPant binding is also true for the A-domain:ACP  
293 complexes<sup>17,35,36</sup>. Hence, it is evident that a defined CoA-binding pocket is lacking in ANL superfamily  
294 members, which is commensurate with the failure to identify the pocket in FACLs using various pocket-  
295 search algorithms. Therefore, arbitrary access of the active site without any selection determinants is  
296 likely to be the root cause of final acceptor promiscuity in the case of these enzymes.

297 It is not clear if these observed spectrum of latent activities in these enzymes' design is an evolutionary  
298 relic or has any physiological relevance in a specific cellular context. The persistence of acceptor  
299 promiscuity can only have two explanations: viz., the cross-reaction products are beneficial, or pocket  
300 modification is not possible without compromising the basic function. In this context, FAALs are  
301 surprisingly high-fidelity enzymes representing the extreme end of the promiscuity spectrum, offering

302 no cross-reaction with CoA as acceptors of the acyl adenylates<sup>9-11,37</sup>. A functional and discriminatory  
303 4'-PPant binding in FAALs have established them as an alternative enzymatic bridge between FA  
304 synthesis, exogenous fatty acids import and PKS/NRPS machinery. FAALs act as a loading module in  
305 PKS/NRPS-mediated biosynthesis of diverse bioactive natural products with fatty acids such as  
306 mycosubtilin, daptomycin, micacocidin, ralsomyacin, olefin, tambjamine, ambruticin, puwainphycins,  
307 jamaicamide, columbamides to name a few. The relevance of the lack of acceptor promiscuity in FAALs  
308 has been demonstrated in Mycobacteria as being responsible for dictating the fate of free-fatty acids  
309 in producing virulent lipids<sup>10</sup>.

310 The conserved sequence and structural features of bacterial FAALs enabled better identification of  
311 FAAL-like domains across all forms of life, except archaea. FAALs may have been recruited to  
312 specifically "load" fatty acids on PKS/NRPS but the possibility of lack of promiscuity in FAALs driving  
313 their over representation cannot be ignored. Their characteristic absence in archaea perhaps can be  
314 explained by the abysmal frequency or absence of PKS or NRPS systems. FAAL-like domains of bacteria  
315 and plants exhibit remarkable sequence similarity, which is expected because of the presence of  
316 canonical PKS/NRPS enzymology in both systems. A few of the identified FAAL-like domains in bacteria  
317 show unique domain organizations such as a fusion with lysophospholipid acyltransferases and alpha  
318 aminoadipate reductases or found interspersed in operons with dehydrogenases, decarboxylase and  
319 ketoacyl synthases. Unique domain architectures are also found in plants, where FAAL-like domains  
320 are sandwiched between HemY and catalase domains and the function of these conserved proteins  
321 remain unknown. These unique architectures are evolutionary instances of the recruitment of FAAL-  
322 like domains for PKS/NRPS independent functions.

323 Interestingly, unique domain architectures are found in FAAL-like domain-containing proteins of fungi  
324 and animals, the majority of which are largely PKS/NRPS free systems. In these organisms, two  
325 tandemly fused FAAL-like domains are found at the C-terminus and a DMAP-1 binding domain at the  
326 N-terminus of a highly conserved protein. These proteins are annotated and characterized as the

327 virulent factor CPS1 in few fungal pathogens such as *Magnaporthe oryzae*<sup>38</sup>, *Cochliobolus*  
328 *heterostrophus*<sup>39</sup> and *Coccidioides posadasii*<sup>40</sup>. Therefore, they are proposed as a target for potential  
329 fungicides and as a vaccine candidate in plant and animal pathogens respectively<sup>38-40</sup>. In invertebrates  
330 and vertebrates, these are known as Dip2 and are important for proper axon bifurcation and guidance  
331 suggesting their physiological importance<sup>41,42</sup>. Recently, we showed that the mice lacking one of the  
332 eukaryotic FAAL-like proteins, Dip2a, show a diet-dependent growth anomaly such as obesity pointing  
333 to their importance in eukaryotic lipid metabolism<sup>43</sup>. The precise molecular and biochemical details  
334 of these proteins are yet to be elucidated. Given the extent of sequence divergence in various motifs  
335 of eukaryotic FAAL-like domains, it is difficult to predict the processes they may be involved in. The  
336 presence of several elements of the CoA-rejection mechanism and their close identity to FAALs allow  
337 us to put forth the hypothesis that eukaryotic FAAL-like domains were recruited for their high acceptor  
338 fidelity property. It is also possible that these divergences have some functional relevance in the  
339 context of eukaryotic metabolism, which may represent an additional member in the spectrum of  
340 biochemical activities represented in the ANL superfamily.

341 The current work identifying FAAL-like enzymology using a universal CoA rejection mechanism may  
342 form the platform for further studies to delineate why they have been recruited in fungal and animal  
343 systems. The study provides new structural and sequence attributes to confirm the identity of FAALs,  
344 many of which remains misannotated and uncharacterized. The study opens new avenues in  
345 combinatorial engineering of PKS/NRPS by using FAALs as a unique module to load fatty acids or  
346 engineer them to load unique molecules with exceptional fidelity. Thus, FAALs can be exploited to  
347 produce novel bioactive molecules by virtue of their unique acceptor-fidelity property.

348 **MATERIAL AND METHODS**

349 **Cloning, expression and purification of proteins:** *EcFAAL* (A0A0H2VDD9), *EcACP* (A0A2X1NC35),  
350 *EcFACL* (P69451), *MsFAAL32* (AOR618), *MSPKS13* (AOR617; 1-1042 residues), *RsFAAL* (Q8XRP4), *RsACP*  
351 (Q8XRP0), *AfFACL* (O30147), *MxFAAL* (Q1CXX0), *MxACP* (Q1CXW9) and *MtFACL13* (P9WQ37) were  
352 amplified by PCR from their respective genomic DNA using Phusion polymerase (Thermo Scientific).  
353 These genes were expressed as hexahistidine-tagged proteins after the induction with IPTG using the  
354 *E. coli* BL21(DE3) expression system. The mutants were generated using quick-change site-directed  
355 mutagenesis. All the proteins including mutants were expressed and purified to homogeneity using  
356 Ni-NTA affinity chromatography followed by size-exclusion chromatography at 4°C. They were flash-  
357 frozen in liquid nitrogen and stored at -80°C until further use.

358 **Biochemical analysis of FAALs and FACLs:** The acyl-AMP and acyl-CoA formation by FAALs and FACLs  
359 were performed by previously described methods<sup>10</sup>. All FACLs (*MtFACL13*, *EcFACL*, *AfFACL*), *EcFAAL*  
360 and *MsFAAL32* were used at 5 µM concentration while *MxFAAL* and *RsFAAL* were used at 7.5 µM. The  
361 <sup>14</sup>C-fatty acids allowed detection of the products on a phosphorimager (Amersham Typhoon FLA 9000),  
362 which were then quantified by densitometry using Image Lab (Bio-Rad Laboratories Inc.). All  
363 experiments were performed as triplicates. The percentage of acyl-AMP converted to acyl-CoA from  
364 the total acyl-AMP formed is used to plot and compare the activity, along with the standard error  
365 of the mean, of wild-type against the respective mutants.

366 **Conversion of apo-ACP to holo-ACP:** All the purified ACPs were converted to *holo*-ACP before being  
367 flash-frozen using previously described protocols<sup>44</sup>. Briefly, after Ni-NTA purification, they were  
368 buffer exchanged to the phosphopantetheinylation buffer (20 mM Tris pH 8.8, 10 mM MgCl<sub>2</sub> and 10  
369 mM dithiothreitol). ~250 µM of ACP was then incubated with 1.25 µM of a non-specific  
370 phosphopantetheinyl transferase Sfp from *B. subtilis* in a 300 µl reaction mixture along with 10 mM  
371 MgCl<sub>2</sub> and 1 mM CoASH. The reaction mixture was incubated at 25°C for 12-16 hours and further  
372 purified using size-exclusion chromatography at 4°C. The *holo*-ACP was flash-frozen in liquid nitrogen

373 and stored at -80°C until further use. The conserved serine on which the 4'-PPant moiety is added,  
374 post-translationally, is mutated to alanine and the resulting protein is used as *apo*-ACP for all assays.

375 **Loading activated acyl chains on *holo*-ACP by FAALs:** The transfer of activated acyl-chain to stand-  
376 alone *holo*-ACP by FAALs was assessed using radiolabelled fatty acids combined with conformationally-  
377 sensitive Urea-PAGE<sup>30</sup>. The following ratio of FAAL to *holo*-ACP was used: 1 μM of *Ec*FAAL with 20 μM  
378 of *Ec*ACP, 4 μM of *Mx*FAAL with 8 μM of *Mx*ACP, 5 μM of *Rs*FAAL with 20 μM *Rs*ACP and 1 μM of  
379 *Ms*FAAL32 with 12.5 μM of *Ms*PKS13ΔC was used. These proteins were incubated in a typical 15 μl  
380 reaction mixture composed of 50 mM HEPES pH 7.2, 5 mM MgCl<sub>2</sub>, 0.01% w/v Tween-20, 0.003 % DMSO,  
381 2 mM ATP and 9 μM of <sup>14</sup>C labelled-fatty acid. The reactions of *Mx*FAAL- *Mx*ACP and *Rs*FAAL-*Rs*ACP  
382 consisted of 20 mM Tris pH 8.0 and lacked DMSO. The reaction mixture was incubated for 2 hours at  
383 30°C and quenched with an equal volume of urea loading dye (25 mM Tris pH 6.8, 1.25 M urea, 20%  
384 glycerol and 0.08% Bromophenol blue). The contents were immediately loaded and separated on a  
385 15% PAGE containing 2.5 M urea. The acyl-transfer on *holo*-*Ms*PKS13<sub>1-1042</sub> by *Ms*FAAL32 was carried  
386 out as previously described<sup>29</sup>. Briefly, <sup>14</sup>C labelled- fatty acid was used to assess the transfer on  
387 *holo*-*Ms*PKS13<sub>1-1042</sub> on an 8% SDS-PAGE. All gels were then dried using a gel drier (Bio-Rad gel dryer  
388 583) and the radiolabelled *acyl*-ACP was detected by using the phosphorimager (Amersham Typhoon  
389 FLA 9000).

390 **Sequence and structural analysis:** All sequences were identified and retrieved from the NCBI  
391 sequence database using *Ec*FAAL as template and BLAST search algorithm. A structure-based  
392 sequence alignment was generated using mSTALI<sup>45</sup> and then other sequences were added to the  
393 alignment in MAFFT<sup>46</sup>. The sequence alignments were rendered using ESPrpt<sup>47</sup>. The phylogenetic  
394 analysis of these sequences was carried out using both neighbour-joining as implemented in MAFFT  
395<sup>46</sup> and maximum-likelihood as implemented in IQTREE<sup>48, 49</sup> using default parameters. The  
396 phylogenetic tree was rendered in MixtureTree Annotator<sup>50</sup>. The images of various organisms were  
397 reusable silhouette images of organisms obtained from Phylopic ([www.phylopic.org](http://www.phylopic.org)) under Creative



398 Commons license. All structural analysis including structural superposition, van der Waal distance  
399 measurements, ligand alignment was carried out with various in-built features of PyMOL <sup>51</sup>. All cavity  
400 search programs were run using default parameters.

401 **AUTHOR CONTRIBUTIONS**

402 GSP and PK contributed equally to the work by designing and performing all the experiments. SP, ND,  
403 SM and SS also contributed to expression and purification of protein. SN contributed to initial  
404 optimization of acyl-transfer assays of FAALs. MKM, KDP, SM and SS contributed to generation of  
405 constructs. RSN conceived and supervised the study. GSP, PK and RSN wrote the manuscript with help  
406 from RSG, BP and SM. All the authors have analysed and reviewed the data and manuscript.

407 **FUNDING SOURCES**

408 GSP and PK thank the Department of Biotechnology, India for research fellowship. SM and SS thank  
409 CSIR, India and UGC, India for research fellowship. R.S. thanks SERB-NPDF, NCP under health care  
410 theme project of CSIR, India; J.C. Bose Fellowship of SERB, India; and Centre of Excellence Project of  
411 Department of Biotechnology, India.

412 **ACKNOWLEDGMENT**

413 We acknowledge Dr. Pananghat Gayathri (IISER-Pune) and Dr. Raghunand R. Tirumalai (CSIR-CCMB)  
414 for sharing the genomic DNA samples of *Myxococcus xanthus* and *Mycobacterium smegmatis*,  
415 respectively.

416 **COMPETING INTERESTS**

417 The authors declare that they have no competing interests.

418 **DATA AND MATERIALS AVAILABILITY**

419 All data needed to evaluate the conclusions in the paper are present in the paper and/or the  
420 Supplementary Materials. Additional data related to this paper may be requested from the authors.

421 **REFERENCES**

- 422 1. Sieber, S. A. & Marahiel, M. A. Molecular mechanisms underlying nonribosomal peptide  
423 synthesis: approaches to new antibiotics. *Chem Rev* **105**, 715-738, doi:10.1021/cr0301191  
424 (2005).
- 425 2. Gokhale, R. S., Saxena, P., Chopra, T. & Mohanty, D. Versatile polyketide enzymatic machinery  
426 for the biosynthesis of complex mycobacterial lipids. *Nat Prod Rep* **24**, 267-277,  
427 doi:10.1039/b616817p (2007).
- 428 3. Walsh, C. T. Polyketide and nonribosomal peptide antibiotics: modularity and versatility.  
429 *Science* **303**, 1805-1810, doi:10.1126/science.1094318 (2004).
- 430 4. Hansen, D. B., Bumpus, S. B., Aron, Z. D., Kelleher, N. L. & Walsh, C. T. The loading module of  
431 mycosubtilin: an adenylation domain with fatty acid selectivity. *J Am Chem Soc* **129**, 6366-  
432 6367, doi:10.1021/ja070890j (2007).
- 433 5. Hemmerling, F., Lebe, K. E., Wunderlich, J. & Hahn, F. An Unusual Fatty Acyl:Adenylate Ligase  
434 (FAAL)-Acyl Carrier Protein (ACP) Didomain in Ambruticin Biosynthesis. *ChemBiochem* **19**,  
435 1006-1011, doi:10.1002/cbic.201800084 (2018).
- 436 6. Linne, U., Schafer, A., Stubbs, M. T. & Marahiel, M. A. Aminoacyl-coenzyme A synthesis  
437 catalyzed by adenylation domains. *FEBS Lett* **581**, 905-910, doi:10.1016/j.febslet.2007.01.066  
438 (2007).
- 439 7. Oba, Y., Ojika, M. & Inouye, S. Firefly luciferase is a bifunctional enzyme: ATP-dependent  
440 monooxygenase and a long chain fatty acyl-CoA synthetase. *FEBS Lett* **540**, 251-254,  
441 doi:10.1016/s0014-5793(03)00272-2 (2003).
- 442 8. Oba, Y., Iida, K. & Inouye, S. Functional conversion of fatty acyl-CoA synthetase to firefly  
443 luciferase by site-directed mutagenesis: a key substitution responsible for luminescence  
444 activity. *FEBS Lett* **583**, 2004-2008, doi:10.1016/j.febslet.2009.05.018 (2009).
- 445 9. Trivedi, O. A. *et al.* Enzymic activation and transfer of fatty acids as acyl-adenylates in  
446 mycobacteria. *Nature* **428**, 441-445, doi:10.1038/nature02384 (2004).

- 447 10. Arora, P. *et al.* Mechanistic and functional insights into fatty acid activation in *Mycobacterium*  
448 *tuberculosis*. *Nat Chem Biol* **5**, 166-173, doi:10.1038/nchembio.143 (2009).
- 449 11. Goyal, A., Verma, P., Anandhakrishnan, M., Gokhale, R. S. & Sankaranarayanan, R. Molecular  
450 basis of the functional divergence of fatty acyl-AMP ligase biosynthetic enzymes of  
451 *Mycobacterium tuberculosis*. *J Mol Biol* **416**, 221-238, doi:10.1016/j.jmb.2011.12.031 (2012).
- 452 12. Zhang, Z. *et al.* Structural and functional studies of fatty acyl adenylate ligases from *E. coli* and  
453 *L. pneumophila*. *J Mol Biol* **406**, 313-324, doi:10.1016/j.jmb.2010.12.011 (2011).
- 454 13. Gulick, A. M., Starai, V. J., Horswill, A. R., Homick, K. M. & Escalante-Semerena, J. C. The 1.75  
455 Å crystal structure of acetyl-CoA synthetase bound to adenosine-5'-propylphosphate and  
456 coenzyme A. *Biochemistry* **42**, 2866-2873, doi:10.1021/bi0271603 (2003).
- 457 14. Reger, A. S., Carney, J. M. & Gulick, A. M. Biochemical and crystallographic analysis of  
458 substrate binding and conformational changes in acetyl-CoA synthetase. *Biochemistry* **46**,  
459 6536-6546, doi:10.1021/bi6026506 (2007).
- 460 15. Reger, A. S., Wu, R., Dunaway-Mariano, D. & Gulick, A. M. Structural characterization of a 140  
461 degrees domain movement in the two-step reaction catalyzed by 4-chlorobenzoate:CoA  
462 ligase. *Biochemistry* **47**, 8016-8025, doi:10.1021/bi800696y (2008).
- 463 16. Kochan, G., Pilka, E. S., von Delft, F., Oppermann, U. & Yue, W. W. Structural snapshots for the  
464 conformation-dependent catalysis by human medium-chain acyl-coenzyme A synthetase  
465 ACSM2A. *J Mol Biol* **388**, 997-1008, doi:10.1016/j.jmb.2009.03.064 (2009).
- 466 17. Mitchell, C. A., Shi, C., Aldrich, C. C. & Gulick, A. M. Structure of PA1221, a nonribosomal  
467 peptide synthetase containing adenylation and peptidyl carrier protein domains. *Biochemistry*  
468 **51**, 3252-3263, doi:10.1021/bi300112e (2012).
- 469 18. Li, Z. & Nair, S. K. Structural Basis for Specificity and Flexibility in a Plant 4-Coumarate:CoA  
470 Ligase. *Structure* **23**, 2032-2042, doi:10.1016/j.str.2015.08.012 (2015).

- 471 19. Miller, B. R., Drake, E. J., Shi, C., Aldrich, C. C. & Gulick, A. M. Structures of a Nonribosomal  
472 Peptide Synthetase Module Bound to MbtH-like Proteins Support a Highly Dynamic Domain  
473 Architecture. *J Biol Chem* **291**, 22559-22571, doi:10.1074/jbc.M116.746297 (2016).
- 474 20. Hughes, A. J. & Keatinge-Clay, A. Enzymatic extender unit generation for in vitro polyketide  
475 synthase reactions: structural and functional showcasing of *Streptomyces coelicolor* MatB.  
476 *Chem Biol* **18**, 165-176, doi:10.1016/j.chembiol.2010.12.014 (2011).
- 477 21. Li, W., Gu, S., Fleming, J. & Bi, L. Crystal structure of FadD32, an enzyme essential for mycolic  
478 acid biosynthesis in mycobacteria. *Sci Rep* **5**, 15493, doi:10.1038/srep15493 (2015).
- 479 22. Guillet, V. *et al.* Insight into Structure-Function Relationships and Inhibition of the Fatty Acyl-  
480 AMP Ligase (FadD32) Orthologs from Mycobacteria. *J Biol Chem* **291**, 7973-7989,  
481 doi:10.1074/jbc.M115.712612 (2016).
- 482 23. Pravda, L. *et al.* MOLEonline: a web-based tool for analyzing channels, tunnels and pores (2018  
483 update). *Nucleic Acids Res* **46**, W368-W373, doi:10.1093/nar/gky309 (2018).
- 484 24. Volkamer, A., Kuhn, D., Rippmann, F. & Rarey, M. DoGSiteScorer: a web server for automatic  
485 binding site prediction, analysis and druggability assessment. *Bioinformatics* **28**, 2074-2075,  
486 doi:10.1093/bioinformatics/bts310 (2012).
- 487 25. Fahrrolfes, R. *et al.* ProteinsPlus: a web portal for structure analysis of macromolecules.  
488 *Nucleic Acids Res* **45**, W337-W343, doi:10.1093/nar/gkx333 (2017).
- 489 26. Smith, R. H. B., Dar, A. C. & Schlessinger, A. PyVOL: a PyMOL plugin for visualization,  
490 comparison, and volume calculation of drug-binding sites. *bioRxiv*, 816702,  
491 doi:10.1101/816702 (2019).
- 492 27. Oliveira, S. H. *et al.* KVFinder: steered identification of protein cavities as a PyMOL plugin. *BMC*  
493 *Bioinformatics* **15**, 197, doi:10.1186/1471-2105-15-197 (2014).
- 494 28. Yu, J., Zhou, Y., Tanaka, I. & Yao, M. Roll: a new algorithm for the detection of protein pockets  
495 and cavities with a rolling probe sphere. *Bioinformatics* **26**, 46-52,  
496 doi:10.1093/bioinformatics/btp599 (2010).

- 497 29. Kuhn, M. L. *et al.* Structure of the Essential Mtb FadD32 Enzyme: A Promising Drug Target for  
498 Treating Tuberculosis. *ACS Infect Dis* **2**, 579-591, doi:10.1021/acsinfecdis.6b00082 (2016).
- 499 30. Post-Beittenmiller, D., Jaworski, J. G. & Ohlrogge, J. B. In vivo pools of free and acylated acyl  
500 carrier proteins in spinach. Evidence for sites of regulation of fatty acid biosynthesis. *J Biol*  
501 *Chem* **266**, 1858-1865 (1991).
- 502 31. Chen, Y. *et al.* Crystal structure of the thioesterification conformation of *Bacillus subtilis* o-  
503 succinylbenzoyl-CoA synthetase reveals a distinct substrate-binding mode. *J Biol Chem* **292**,  
504 12296-12310, doi:10.1074/jbc.M117.790410 (2017).
- 505 32. Leibundgut, M., Jenni, S., Frick, C. & Ban, N. Structural basis for substrate delivery by acyl  
506 carrier protein in the yeast fatty acid synthase. *Science* **316**, 288-290,  
507 doi:10.1126/science.1138249 (2007).
- 508 33. Arora, P., Vats, A., Saxena, P., Mohanty, D. & Gokhale, R. S. Promiscuous fatty acyl CoA ligases  
509 produce acyl-CoA and acyl-SNAC precursors for polyketide biosynthesis. *J Am Chem Soc* **127**,  
510 9388-9389, doi:10.1021/ja052991s (2005).
- 511 34. Zahn, M. *et al.* Structures of 2-Hydroxyisobutyric Acid-CoA Ligase Reveal Determinants of  
512 Substrate Specificity and Describe a Multi-Conformational Catalytic Cycle. *J Mol Biol* **431**,  
513 2747-2761, doi:10.1016/j.jmb.2019.05.027 (2019).
- 514 35. Sundlov, J. A., Shi, C., Wilson, D. J., Aldrich, C. C. & Gulick, A. M. Structural and functional  
515 investigation of the intermolecular interaction between NRPS adenylation and carrier protein  
516 domains. *Chem Biol* **19**, 188-198, doi:10.1016/j.chembiol.2011.11.013 (2012).
- 517 36. Sundlov, J. A. & Gulick, A. M. Structure determination of the functional domain interaction of  
518 a chimeric nonribosomal peptide synthetase from a challenging crystal with  
519 noncrystallographic translational symmetry. *Acta Crystallogr D Biol Crystallogr* **69**, 1482-1492,  
520 doi:10.1107/S0907444913009372 (2013).

- 521 37. Priyadarshan, K. & Sankaranarayanan, R. Fatty Acyl-AMP Ligases as Mechanistic Variants of  
522 ANL Superfamily and Molecular Determinants Dictating Substrate Specificities. *Journal of the*  
523 *Indian Institute of Science* **98**, 261-272, doi:10.1007/s41745-018-0084-2 (2018).
- 524 38. Wang, Y. *et al.* MoCps1 is important for conidiation, conidial morphology and virulence in  
525 *Magnaporthe oryzae*. *Curr Genet* **62**, 861-871, doi:10.1007/s00294-016-0593-3 (2016).
- 526 39. Lu, S. W. *et al.* A novel class of gene controlling virulence in plant pathogenic ascomycete  
527 fungi. *Proc Natl Acad Sci U S A* **100**, 5980-5985, doi:10.1073/pnas.0931375100 (2003).
- 528 40. Narra, H. P. *et al.* A *Coccidioides posadasii* CPS1 Deletion Mutant Is Avirulent and Protects  
529 Mice from Lethal Infection. *Infect Immun* **84**, 3007-3016, doi:10.1128/IAI.00633-16 (2016).
- 530 41. Nitta, Y., Yamazaki, D., Sugie, A., Hiroi, M. & Tabata, T. DISCO Interacting Protein 2 regulates  
531 axonal bifurcation and guidance of *Drosophila* mushroom body neurons. *Dev Biol* **421**, 233-  
532 244, doi:10.1016/j.ydbio.2016.11.015 (2017).
- 533 42. Noblett, N. *et al.* DIP-2 suppresses ectopic neurite sprouting and axonal regeneration in  
534 mature neurons. *J Cell Biol* **218**, 125-133, doi:10.1083/jcb.201804207 (2019).
- 535 43. Kinatukara, P. *et al.* Peri-natal growth retardation rate and fat mass accumulation in mice  
536 lacking Dip2A is dependent on the dietary composition. *Transgenic Res* **29**, 553-562,  
537 doi:10.1007/s11248-020-00219-6 (2020).
- 538 44. Lambalot, R. H. *et al.* A new enzyme superfamily - the phosphopantetheinyl transferases.  
539 *Chem Biol* **3**, 923-936, doi:10.1016/s1074-5521(96)90181-7 (1996).
- 540 45. Shealy, P. & Valafar, H. Multiple structure alignment with msTALI. *BMC Bioinformatics* **13**, 105,  
541 doi:10.1186/1471-2105-13-105 (2012).
- 542 46. Katoh, K., Rozewicki, J. & Yamada, K. D. MAFFT online service: multiple sequence alignment,  
543 interactive sequence choice and visualization. *Brief Bioinform* **20**, 1160-1166,  
544 doi:10.1093/bib/bbx108 (2019).
- 545 47. Robert, X. & Gouet, P. Deciphering key features in protein structures with the new ENDscript  
546 server. *Nucleic Acids Res* **42**, W320-324, doi:10.1093/nar/gku316 (2014).

- 547 48. Nguyen, L. T., Schmidt, H. A., von Haeseler, A. & Minh, B. Q. IQ-TREE: a fast and effective  
548 stochastic algorithm for estimating maximum-likelihood phylogenies. *Mol Biol Evol* **32**, 268-  
549 274, doi:10.1093/molbev/msu300 (2015).
- 550 49. Hoang, D. T., Chernomor, O., von Haeseler, A., Minh, B. Q. & Vinh, L. S. UFBoot2: Improving  
551 the Ultrafast Bootstrap Approximation. *Mol Biol Evol* **35**, 518-522,  
552 doi:10.1093/molbev/msx281 (2018).
- 553 50. Chen, S. C. & Ogata, A. MixtureTree annotator: a program for automatic colorization and visual  
554 annotation of MixtureTree. *PLoS One* **10**, e0118893, doi:10.1371/journal.pone.0118893  
555 (2015).
- 556 51. Schrödinger, LLC. *The PyMOL Molecular Graphics System, Version 1.8* (2015).





557 **Figure-1: The presence of conserved negative selection elements and absence of positive selection**  
558 **elements in canonical CoA-binding pocket of FAALs can prevent CoA-binding:** (a) The CoA-interacting  
559 residues in FACLs (*HsFACL*, *AaFACL*, *NtFACL*, *SeFACL*) and the structurally analogous residues in FAALs  
560 (*EcFAAL*, *MsFAAL32* and *LpFAAL*) are tabulated. The positively charged residues (blue) mainly are from  
561 the C-terminal domain (orange) and occasionally from the N-terminal domain (green). (b) The residues  
562 (cyan) in the vicinity ( $\leq 2.5$  Å) of the bound CoA (yellow; *HsFACL*, PDB: 3EQ6) are shown as van der  
563 Waal spheres (light red) to compare the canonical pocket in FAALs and FACLs. The adenosine-3'-5'-  
564 bisphosphate moiety of CoA is omitted in the representation for clarity. A unique FAAL-specific helix  
565 ( $\text{FSH}_{\text{R251-P259}}$ ) at the entry of the canonical pocket shown in cartoon representation (green) is replaced  
566 by a loop (L287-P293) in FACLs. (c) The canonical pocket obstructing features seen in FAALs (light cyan)  
567 are highlighted in yellow in the structure-based sequence alignment and compared to other  
568 representative members of the ANL superfamily (FACLs in light green and A-domains in light orange).  
569 The secondary structures of *EcFAAL* (PDB: 3PBK) and *HsFACL* (PDB: 3EQ6) are marked at the top and  
570 bottom of the alignment, respectively.

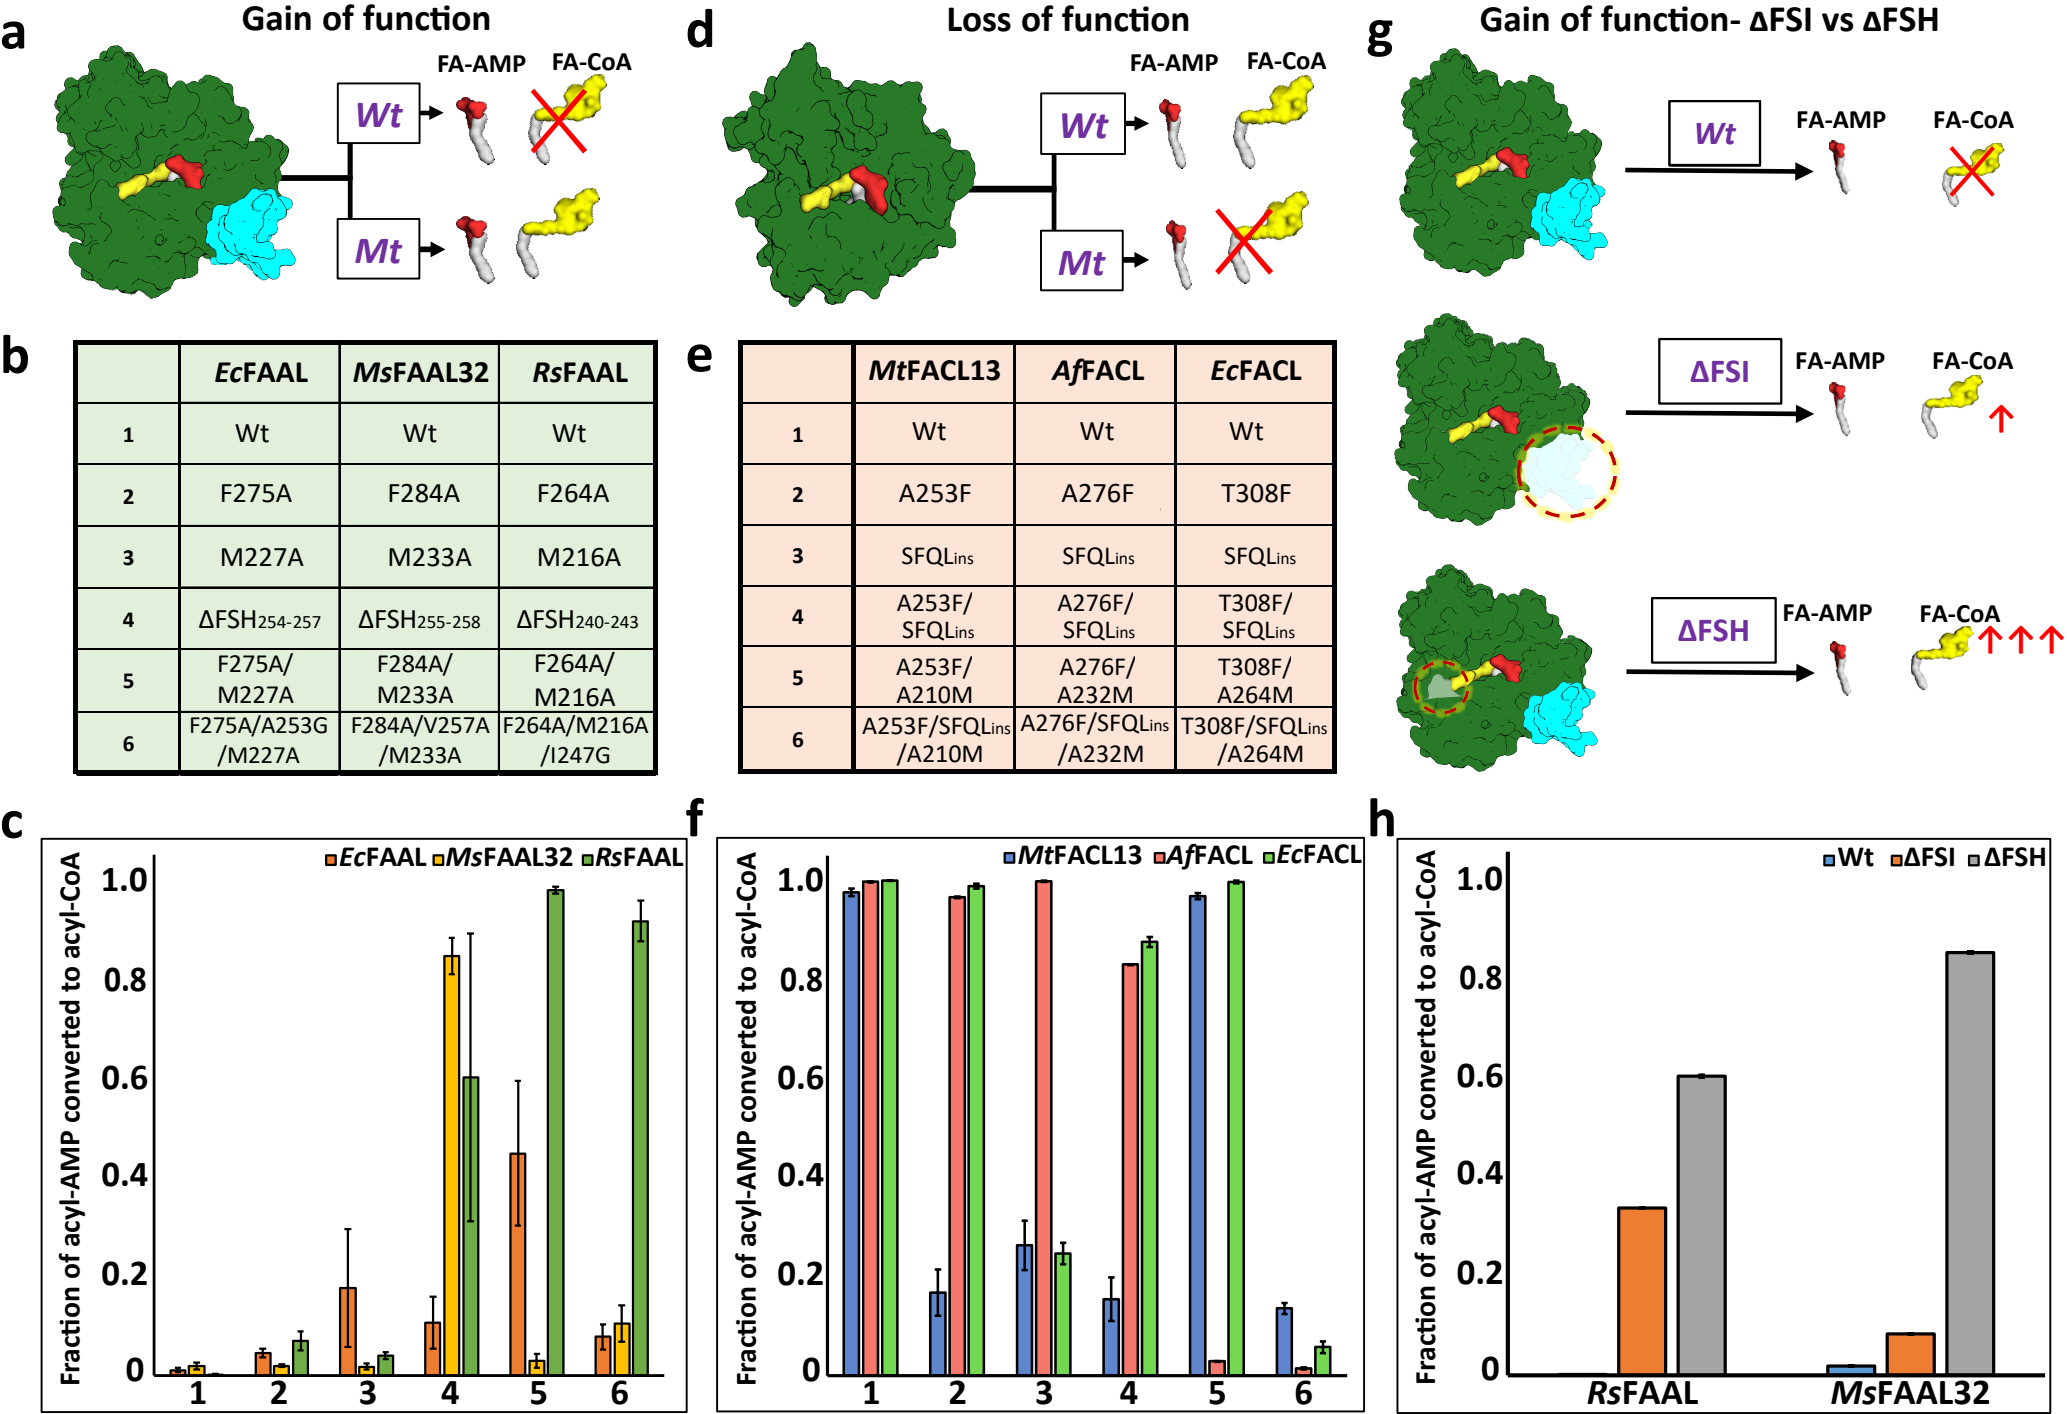

571 **Figure-2: Biochemical analysis of "gain of function" mutants of FAALs and "loss of function" mutants**  
572 **of FACLs:** (a) The biochemical activity of a wild-type (Wt) FAAL as compared to its mutants (Mt) is  
573 schematically represented. (b) The various "gain of function" mutations of FAALs (*EcFAAL*, *MsFAAL32*  
574 & *RsFAAL*) are tabulated as the following: Row-1 = Wild-type protein; Rows-2 and -3 = single point  
575 mutations; row-4 = deletion of FSH and rows-5 and -6 = combinations of these mutations. (c) The  
576 fraction of acyl-AMP converted to acyl-CoA by wild type and various mutants (represented as numbers  
577 on the x-axis according to figure-2b) of FAALs is represented as a bar graph along with standard error  
578 of the mean. (d) The biochemical activity of a wild-type (Wt) FACL as compared to its mutants (Mt) is  
579 schematically represented. (e) The various "loss of function" mutations generated in FACLs (*MtFACL*,  
580 *AfFACL* & *EcFACL*) are tabulated as the following: Row-1 = wild-type protein; row-2 = single point  
581 mutations; row-3 = insertion of FSH; and rows-4, -5 and -6 = combinations of these mutations. (f) The  
582 fraction of acyl-AMP converted to acyl-CoA by wild type and various mutants (represented as numbers  
583 on the x-axis according to figure-2e) of FACLs is represented as a bar graph along with standard error  
584 of the mean. (g) A comparison of the gain of function from  $\Delta$ FSH mutation with  $\Delta$ FSI mutation in FAALs  
585 is schematically represented. (h) The fraction of acyl-AMP converted to acyl-CoA by wild type,  $\Delta$ FSH  
586 and  $\Delta$ FSI mutants of *RsFAAL* and *MsFAAL32* (represented on the x-axis) is represented as a bar graph  
587 along with standard error of the mean.

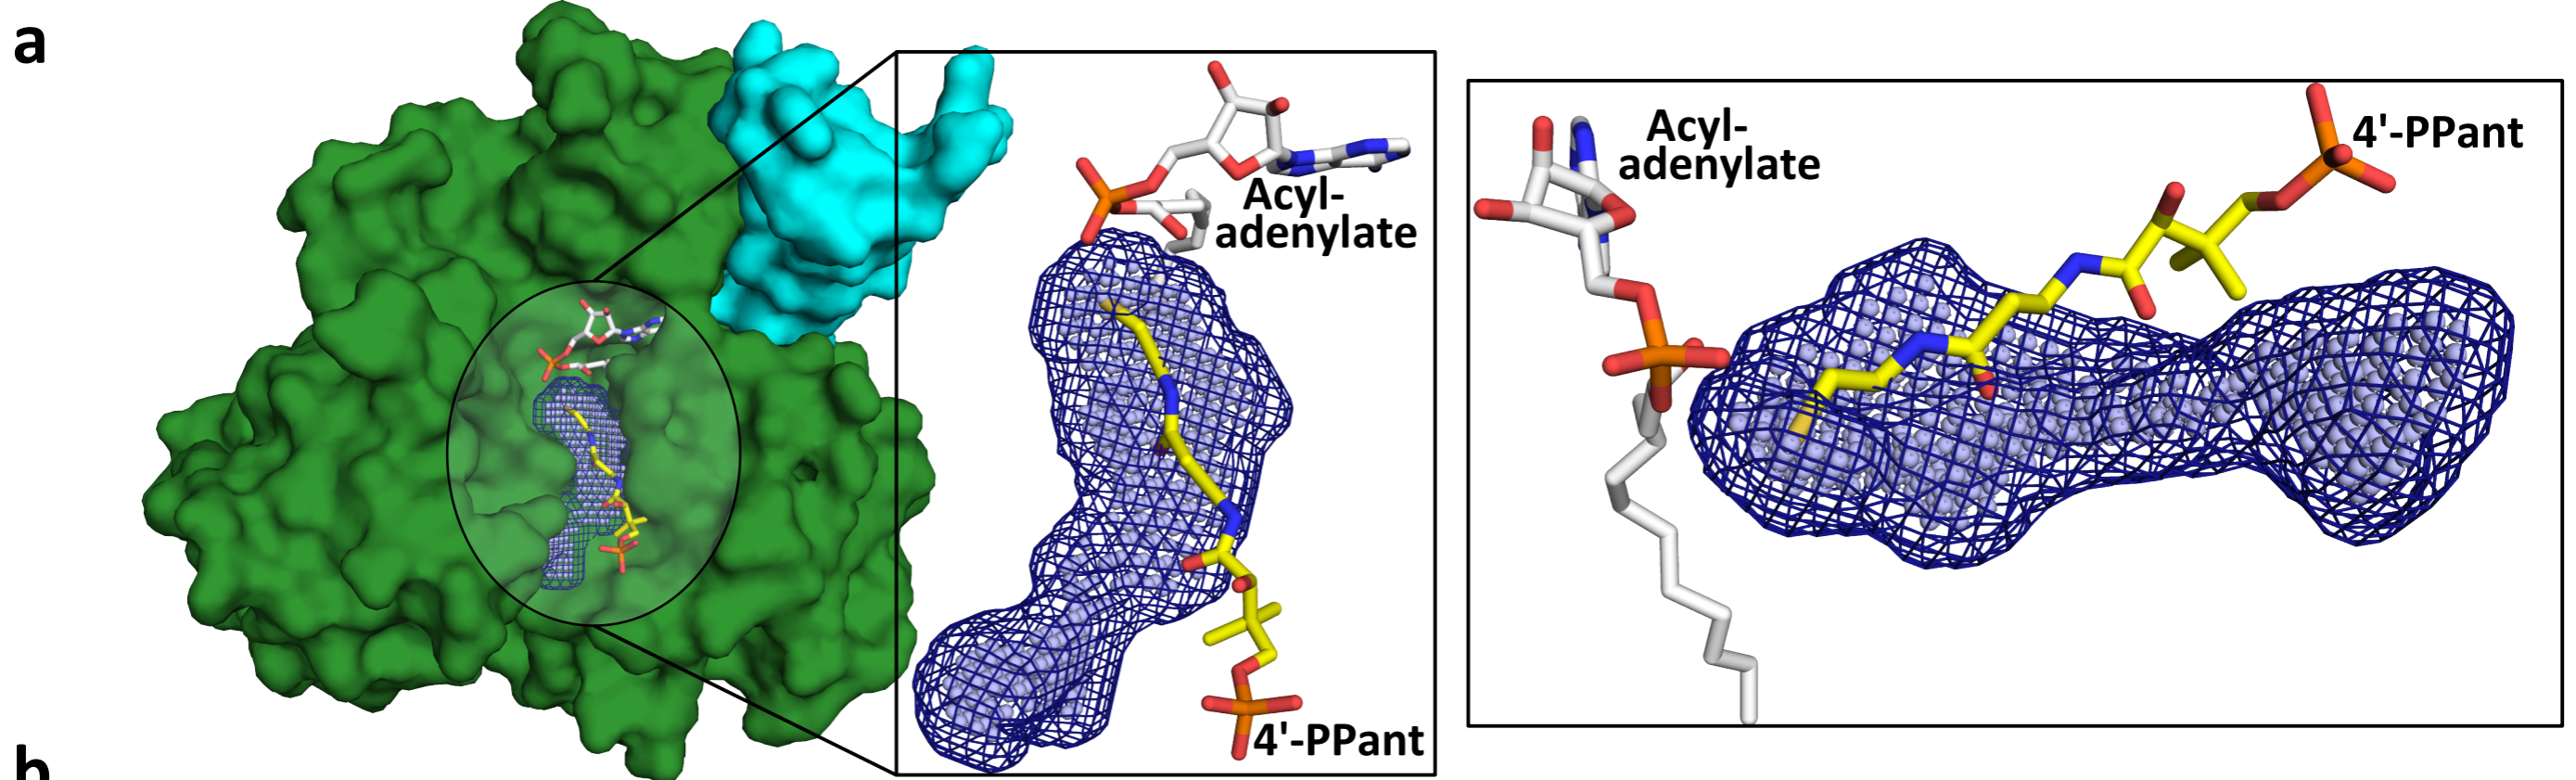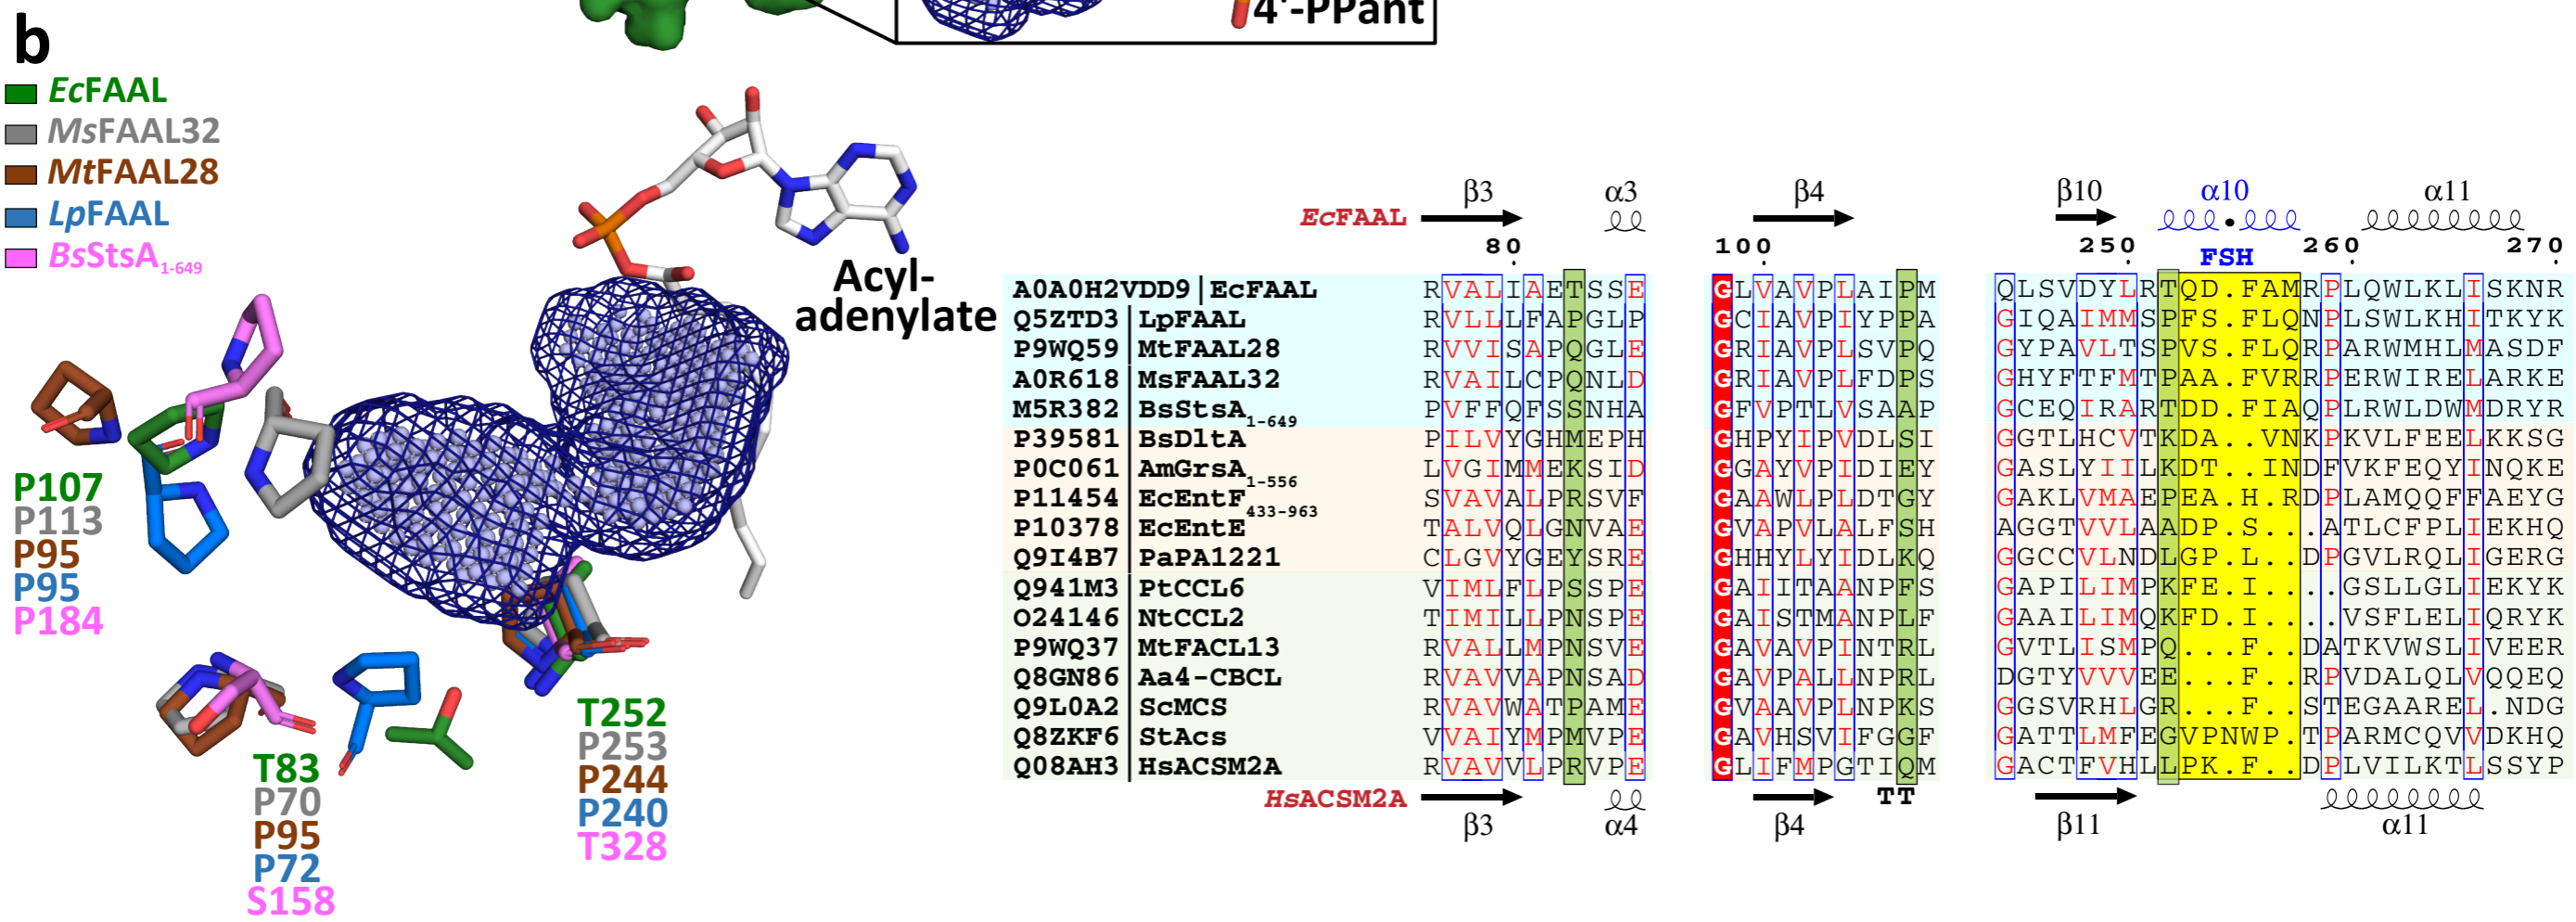

588 **Figure-3: FAALs have an alternative pocket in the N-terminal domain distinct from the canonical**  
589 **CoA-binding pocket and lined by conserved prolines:** (a) The analysis of N-terminal domain of *Ec*FAAL  
590 (PDB: 3PBK) (green; surface representation) with pocket finding algorithms identified a new pocket  
591 (dark blue; mesh representation and light blue; spheres representation). Also shown are the FAAL-  
592 specific insertion (cyan), an *Ec*FAAL-bound lauryl-adenylate (grey; sticks representation) and the 4'-  
593 PPant moiety (yellow; sticks representation) of a CoA bound to *Hs*FACL (PDB: 3EQ6) in the canonical  
594 pocket. The inset shows two different orientations (top-view and lateral-view) of the distinct  
595 alternative pocket poised against the acyl-adenylate and compared to the 4'-PPant of a CoA in  
596 canonical pocket. (b) Various residues (stick representation) of FAALs residing at the entrance of the  
597 unique pocket (dark blue; mesh representation and light blue; spheres representation) are identified  
598 through structural comparison. A structure-based sequence alignment of these residues (highlighted  
599 in pale green) with other representative members of the ANL superfamily reveals that FAALs have a  
600 higher frequency of prolines (occasionally Thr/Ser) than other members of the superfamily.

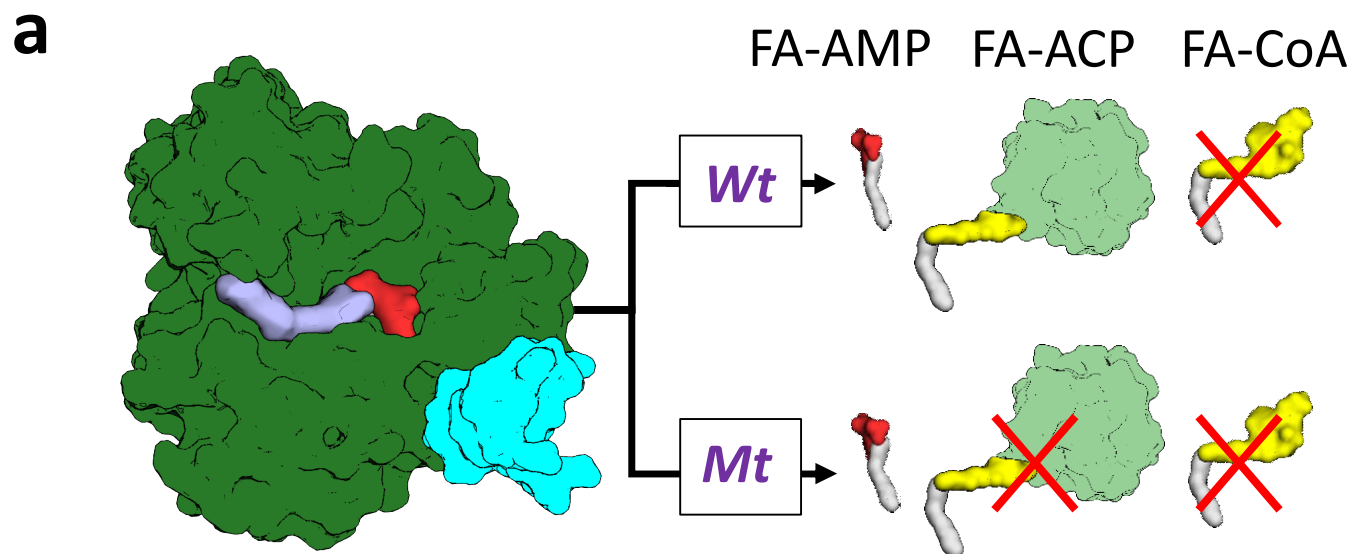

|                 |     |      |      |      |
|-----------------|-----|------|------|------|
| <b>EcFAAL</b>   | T83 | P107 | -    | T252 |
| <b>MsFAAL32</b> | P85 | P110 | P113 | P253 |
| <b>RsFAAL</b>   | A71 | P95  | -    | P237 |
| <b>MxFAAL</b>   | T83 | P106 | P107 | P252 |

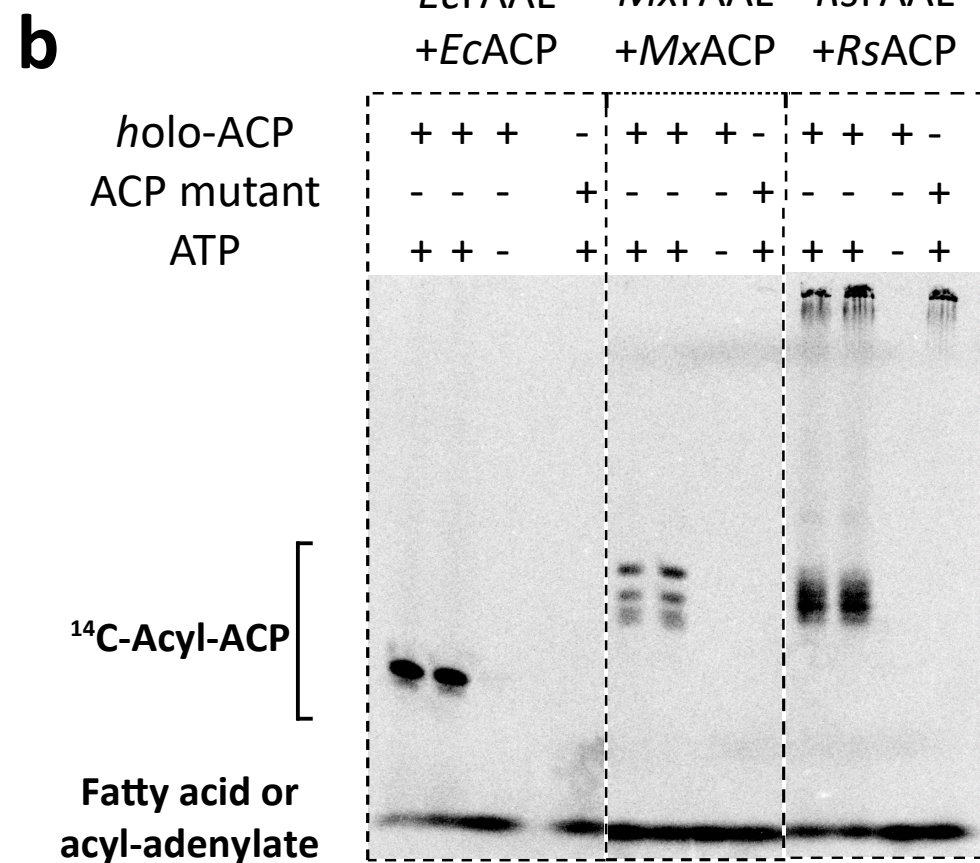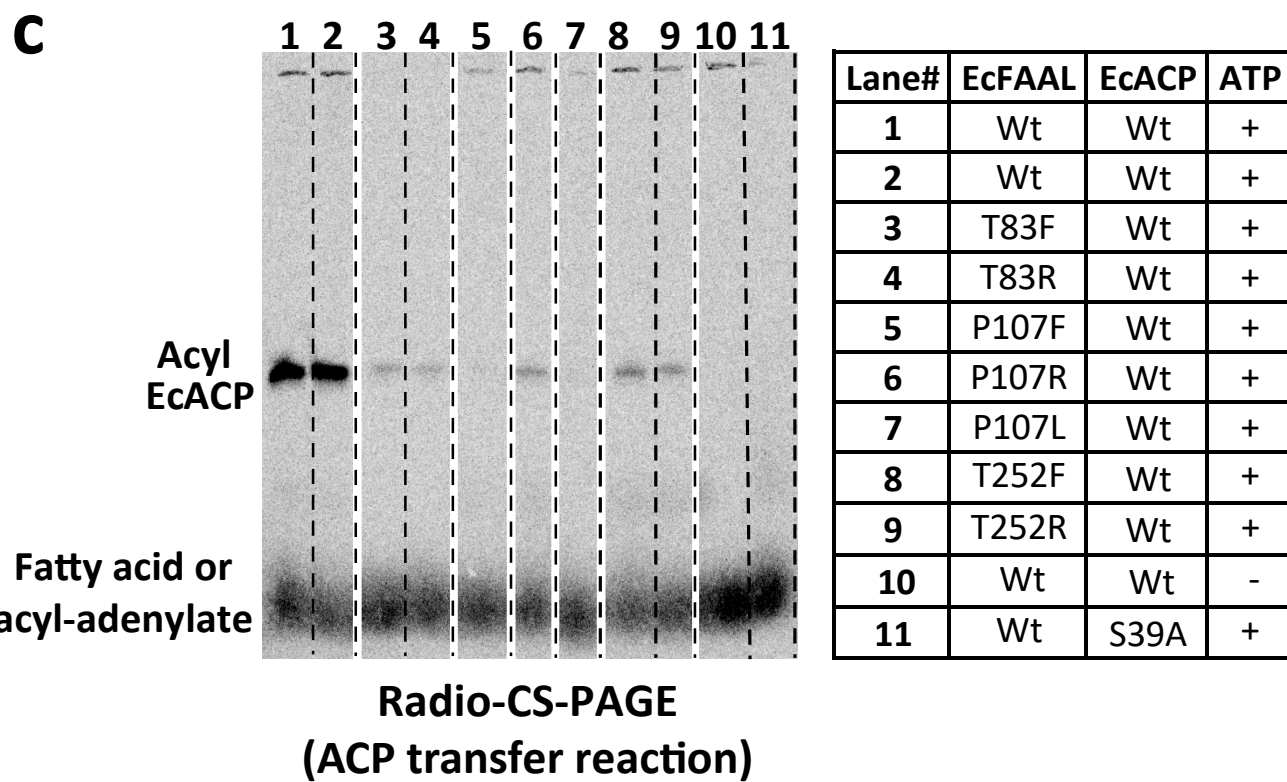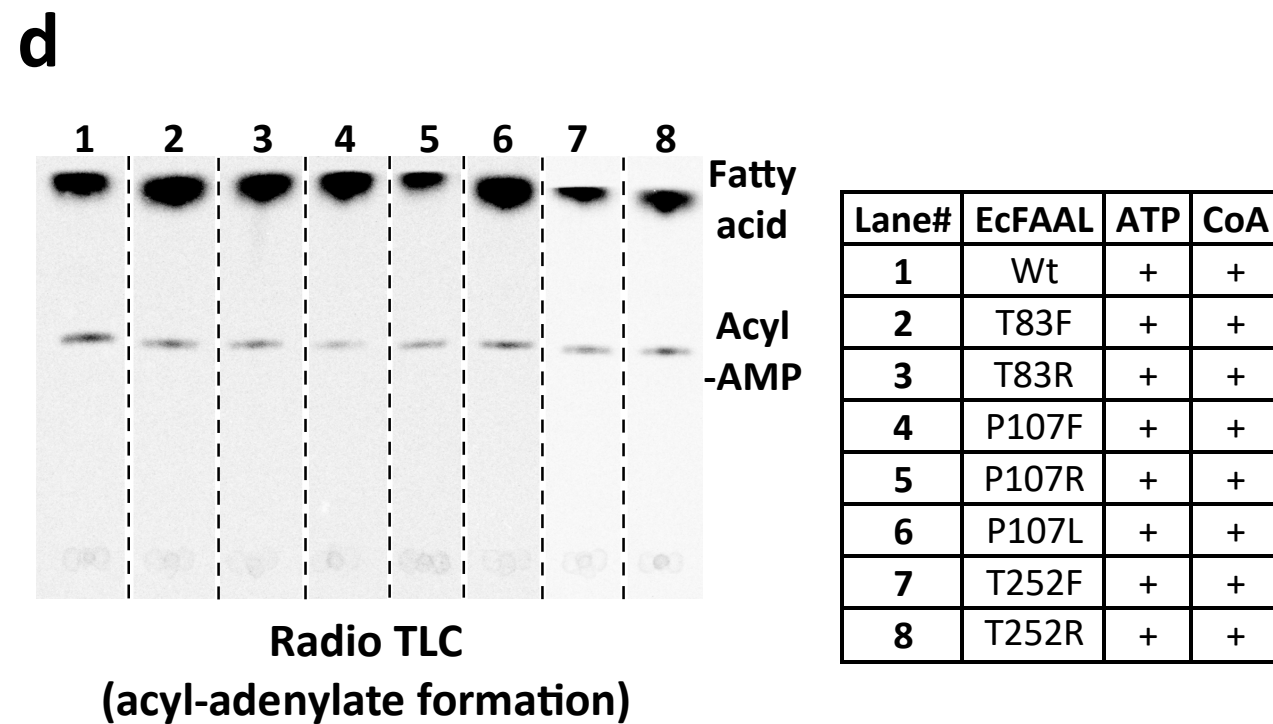

601 **Figure-4: The alternative pocket identified in FAALs is a functional pocket that assists in catalysis by**  
602 **accommodating 4'-PPant tethered to ACP:** (a) A schematic representation of the acyl-transfer  
603 function in a wild type (Wt) FAAL is compared to a mutant protein (Mt) that blocks the alternative  
604 pocket. (b) A representative radio-CS-PAGE gel shows the acyl-transfer reaction by wild type FAALs on  
605 their respective *holo*-ACP. Three representative FAALs (*Ec*FAAL, *Mx*FAAL and *Rs*FAAL) catalyse the  
606 transfer of radioactive acyl group on *holo*-ACP (observed as a bright band on the gel). The reaction  
607 product is not observed if ATP is not included in the reaction or when a mutant ACP (conserved serine  
608 mutated to Alanine) without the 4'-PPant arm is used. (c) The radio-CS-PAGE shows that mutations of  
609 the residues lining the alternative pocket to Arg/Phe show a reduced or negligible acyl-ACP formation.  
610 (d) The radio-TLC shows that loss of acyl-ACP formation is not due to affected acyl-adenylate formation  
611 and these mutants do not form any acyl-CoA.



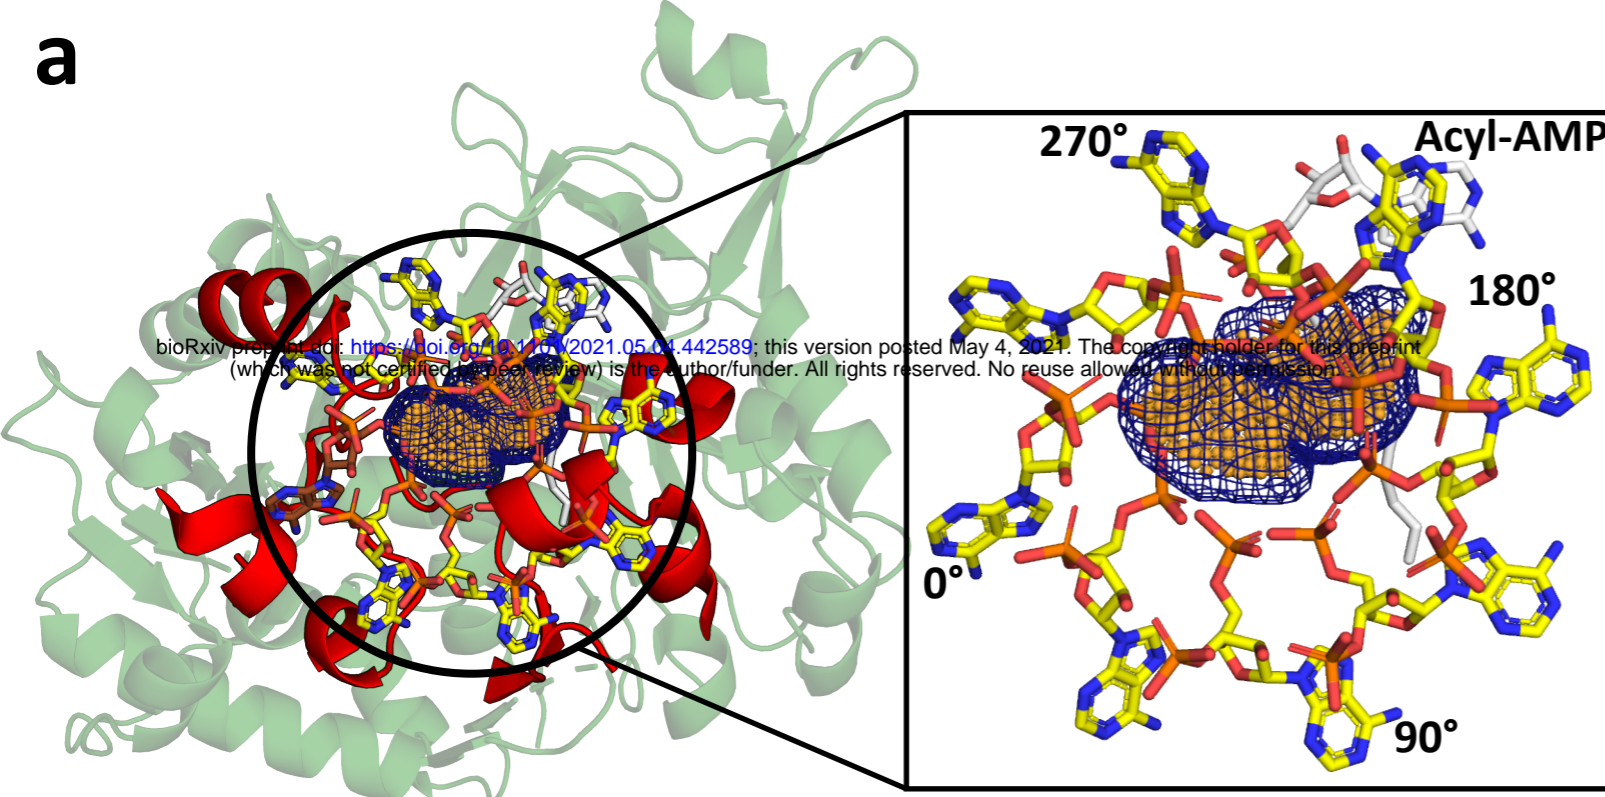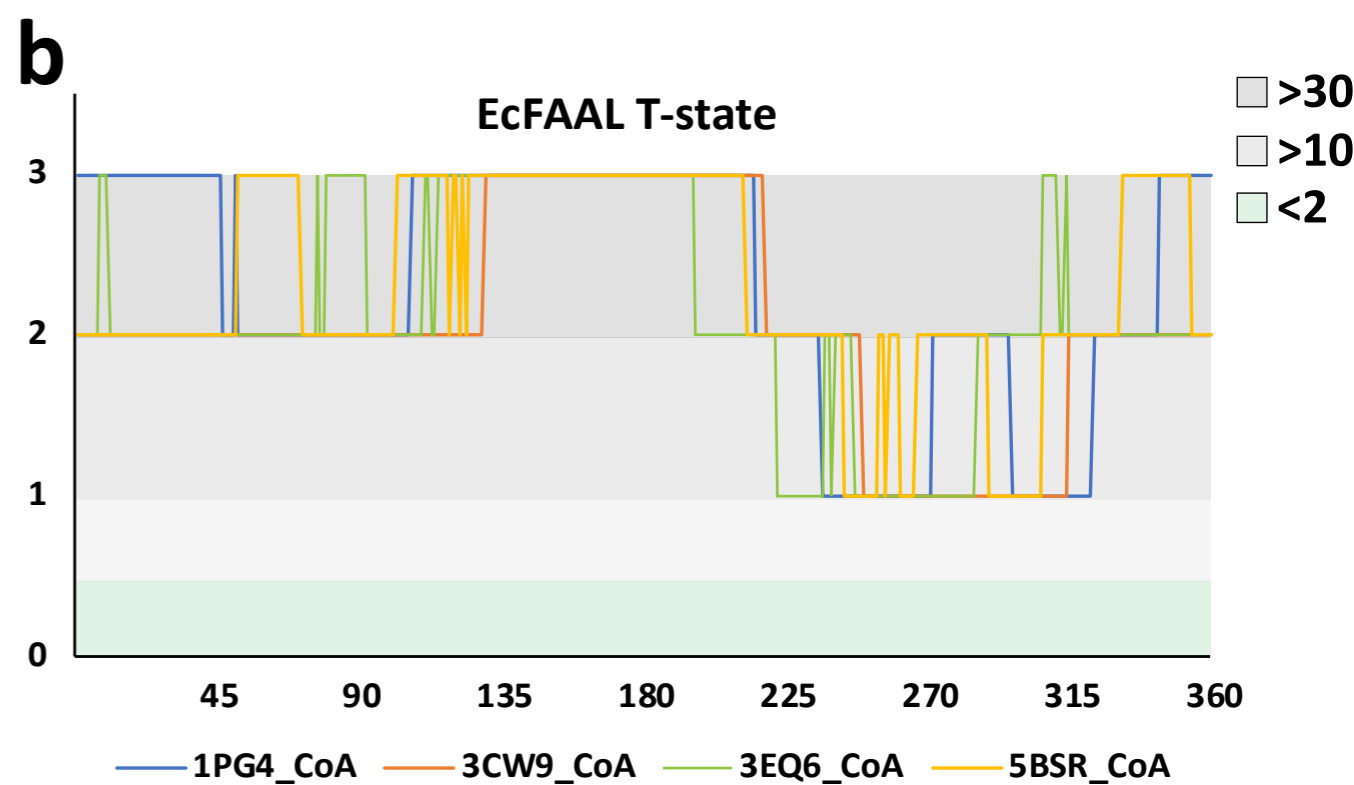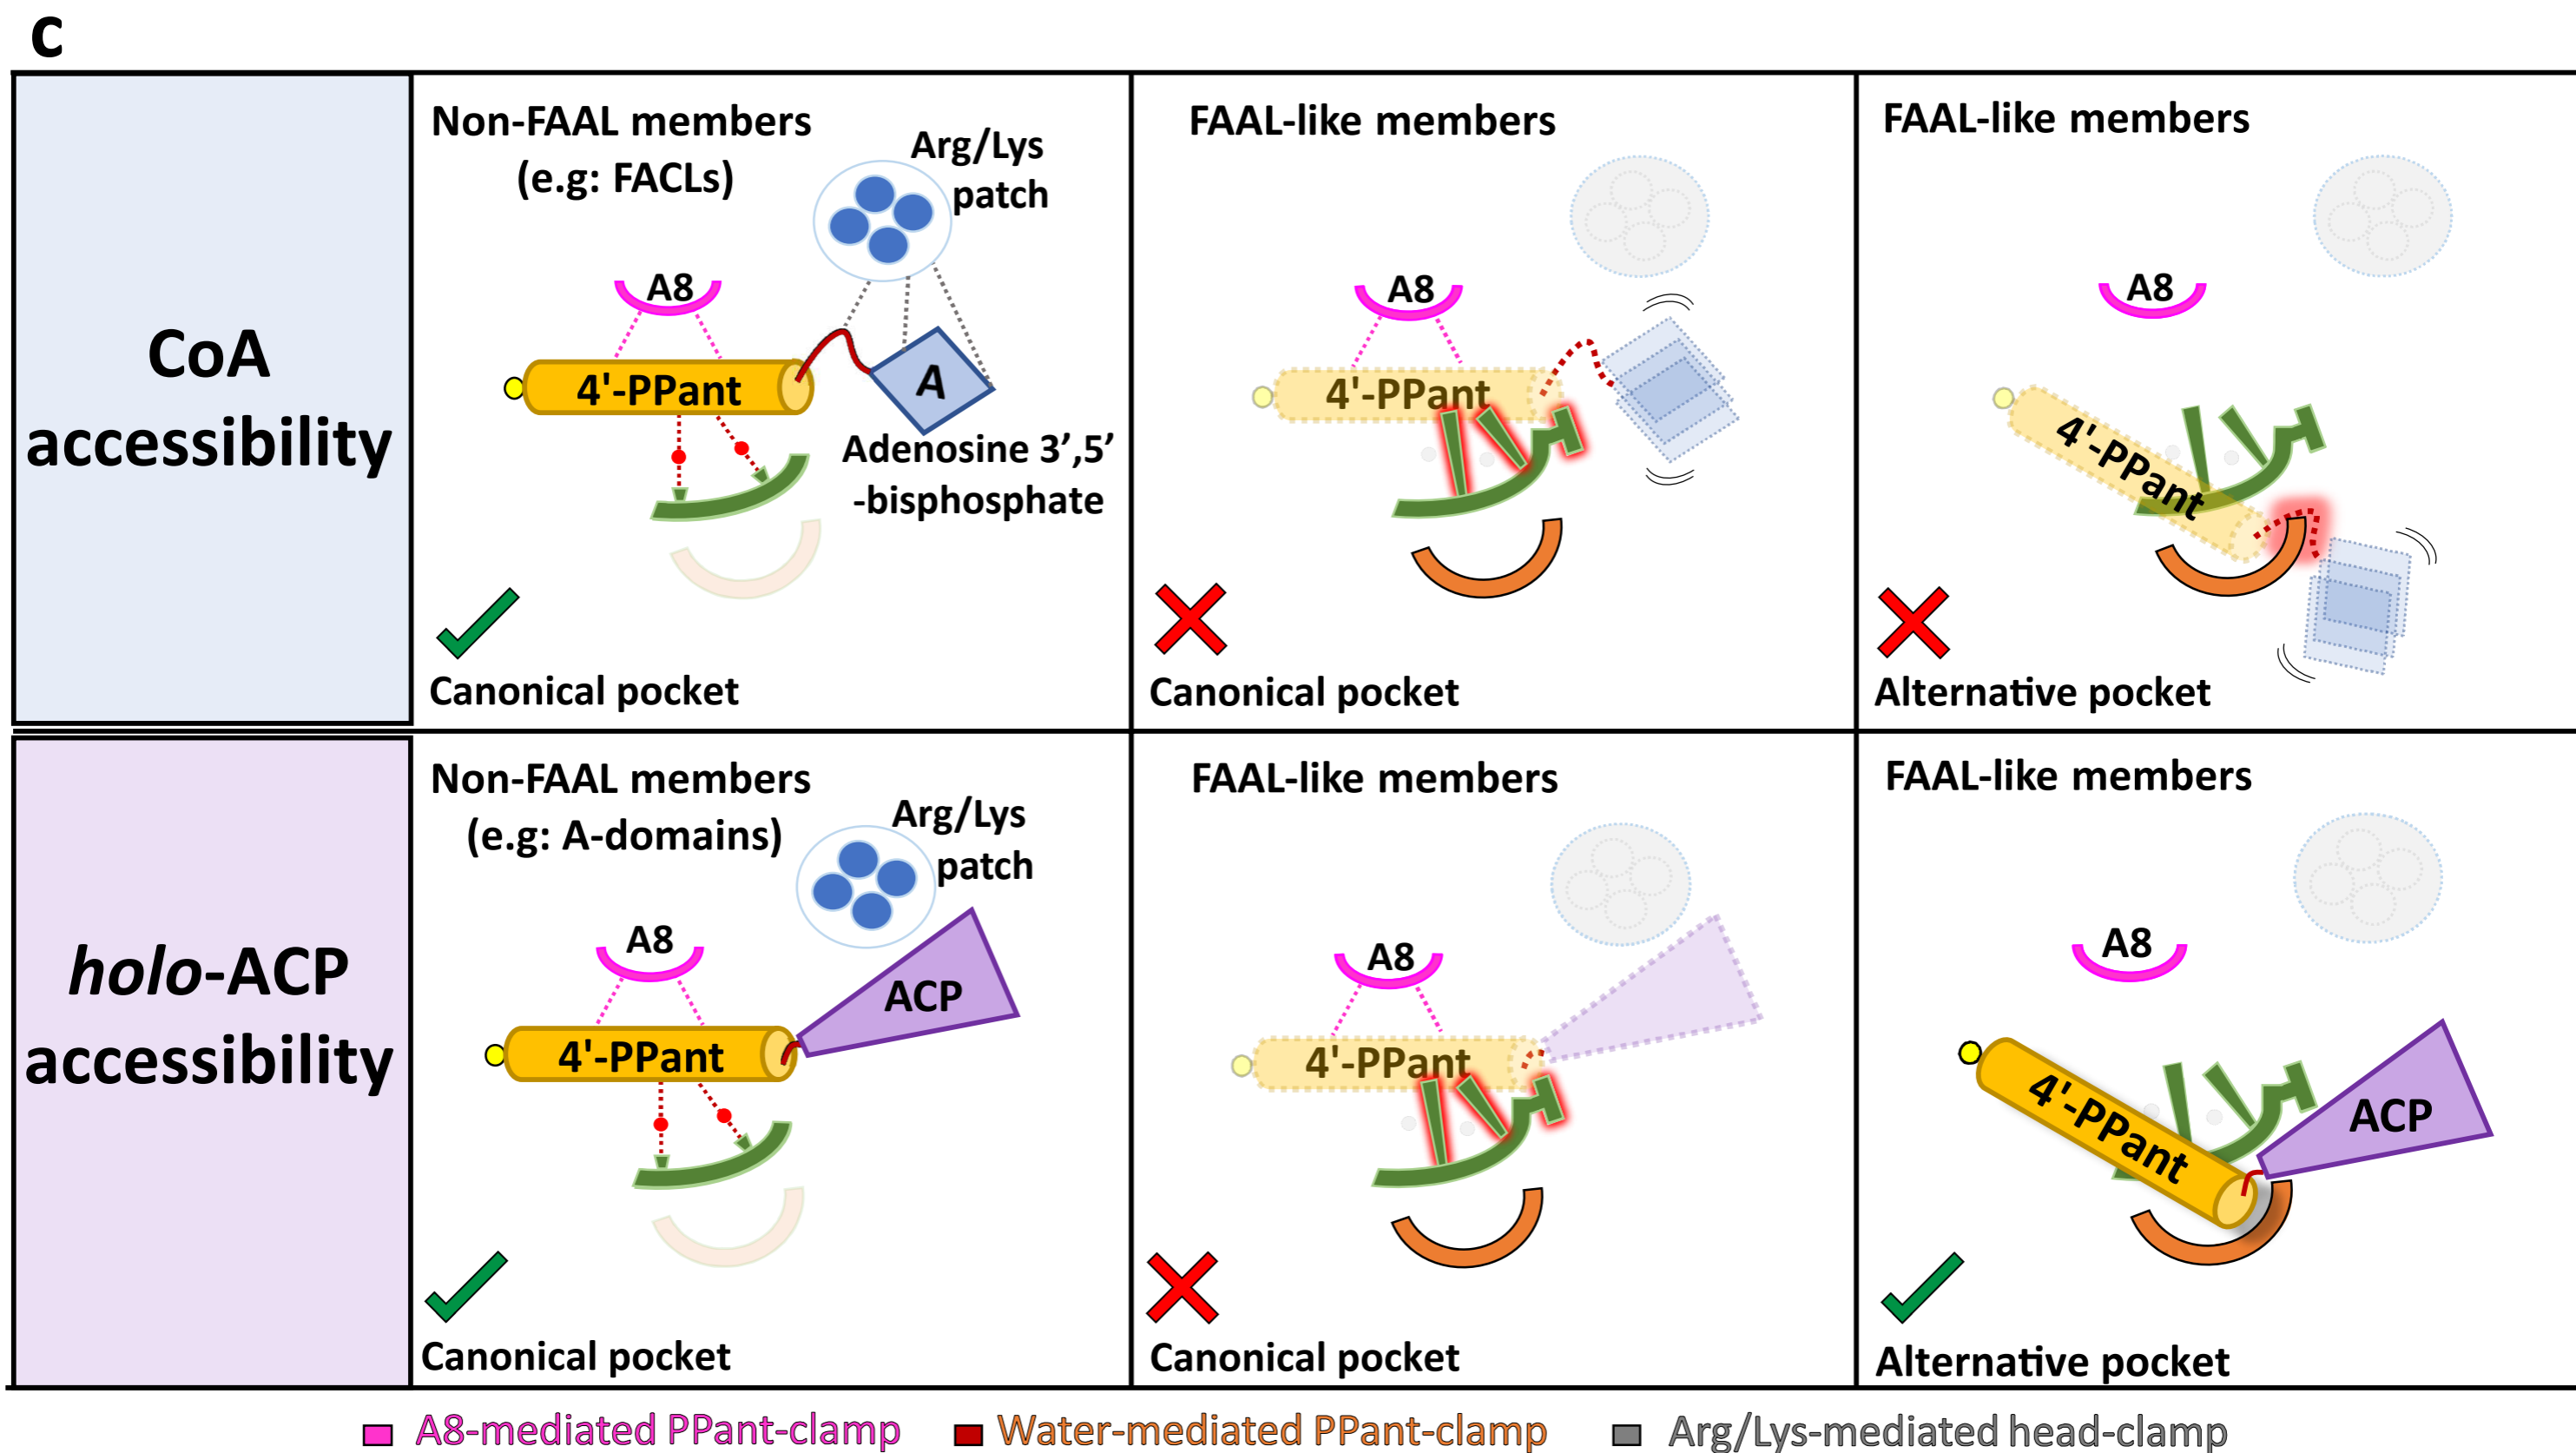

612 **Figure-5: The alternative pocket in FAALs is highly selective, and its unique architecture negatively**  
613 **selects for CoA:** (a) A "mast" (the 4'-PPant arm) is aligned along the longest length of the predicted  
614 pocket (blue; mesh representation) and the "flag" (adenosine 3', 5'-bisphosphate) is rotated to  
615 generate theoretical orientations of the "flag", These conformations of *HsFACL* (PDB: 3EQ6) are shown  
616 (yellow; stick format) at 45° intervals. The regions of the *EcFAAL* (cartoon representation) showing  
617 clashes are highlighted (red). (b) The count of atoms (C, N, O, C $\alpha$  and C $\beta$ ) of *EcFAAL* showing van der  
618 Waals short contacts ( $\leq 0.25$  Å) with the conformations of the "flag" are scored (short contacts  $\geq 30 =$   
619  $3; \geq 10 = 2; \geq 2 = 1$  and  $< 2 = 0$ ). These scores (y-axis) are plotted against the specific rotation angles of  
620 the conformation, where the short contact is observed (x-axis). (c) The universal CoA-rejection  
621 mechanism is schematically summarised. The 4'-PPant (light orange) of both CoA and *holo*-ACP  
622 (purple) bind to the canonical pocket of non-FAAL members through multiple interactions (dotted  
623 lines). Interactions between Arg/Lys patch (circle; blue) and the adenosine 3', 5'-bisphosphate moiety  
624 (rhombus; blue) acts as positive selection. The negative selection elements of the canonical pocket  
625 clash (highlighted in red) with the adenosine 3', 5'-bisphosphate in the alternative pocket. The absence  
626 of Arg/Lys patch (dotted circle) fails to provide stability to the adenosine 3', 5'-bisphosphate moiety  
627 (dotted rhombus; blue). The 4'-PPant (yellow) tethered to ACP (purple) is only accepted in the  
628 alternative pocket, which is absent in non-FAAL members, as it shows no clashes.

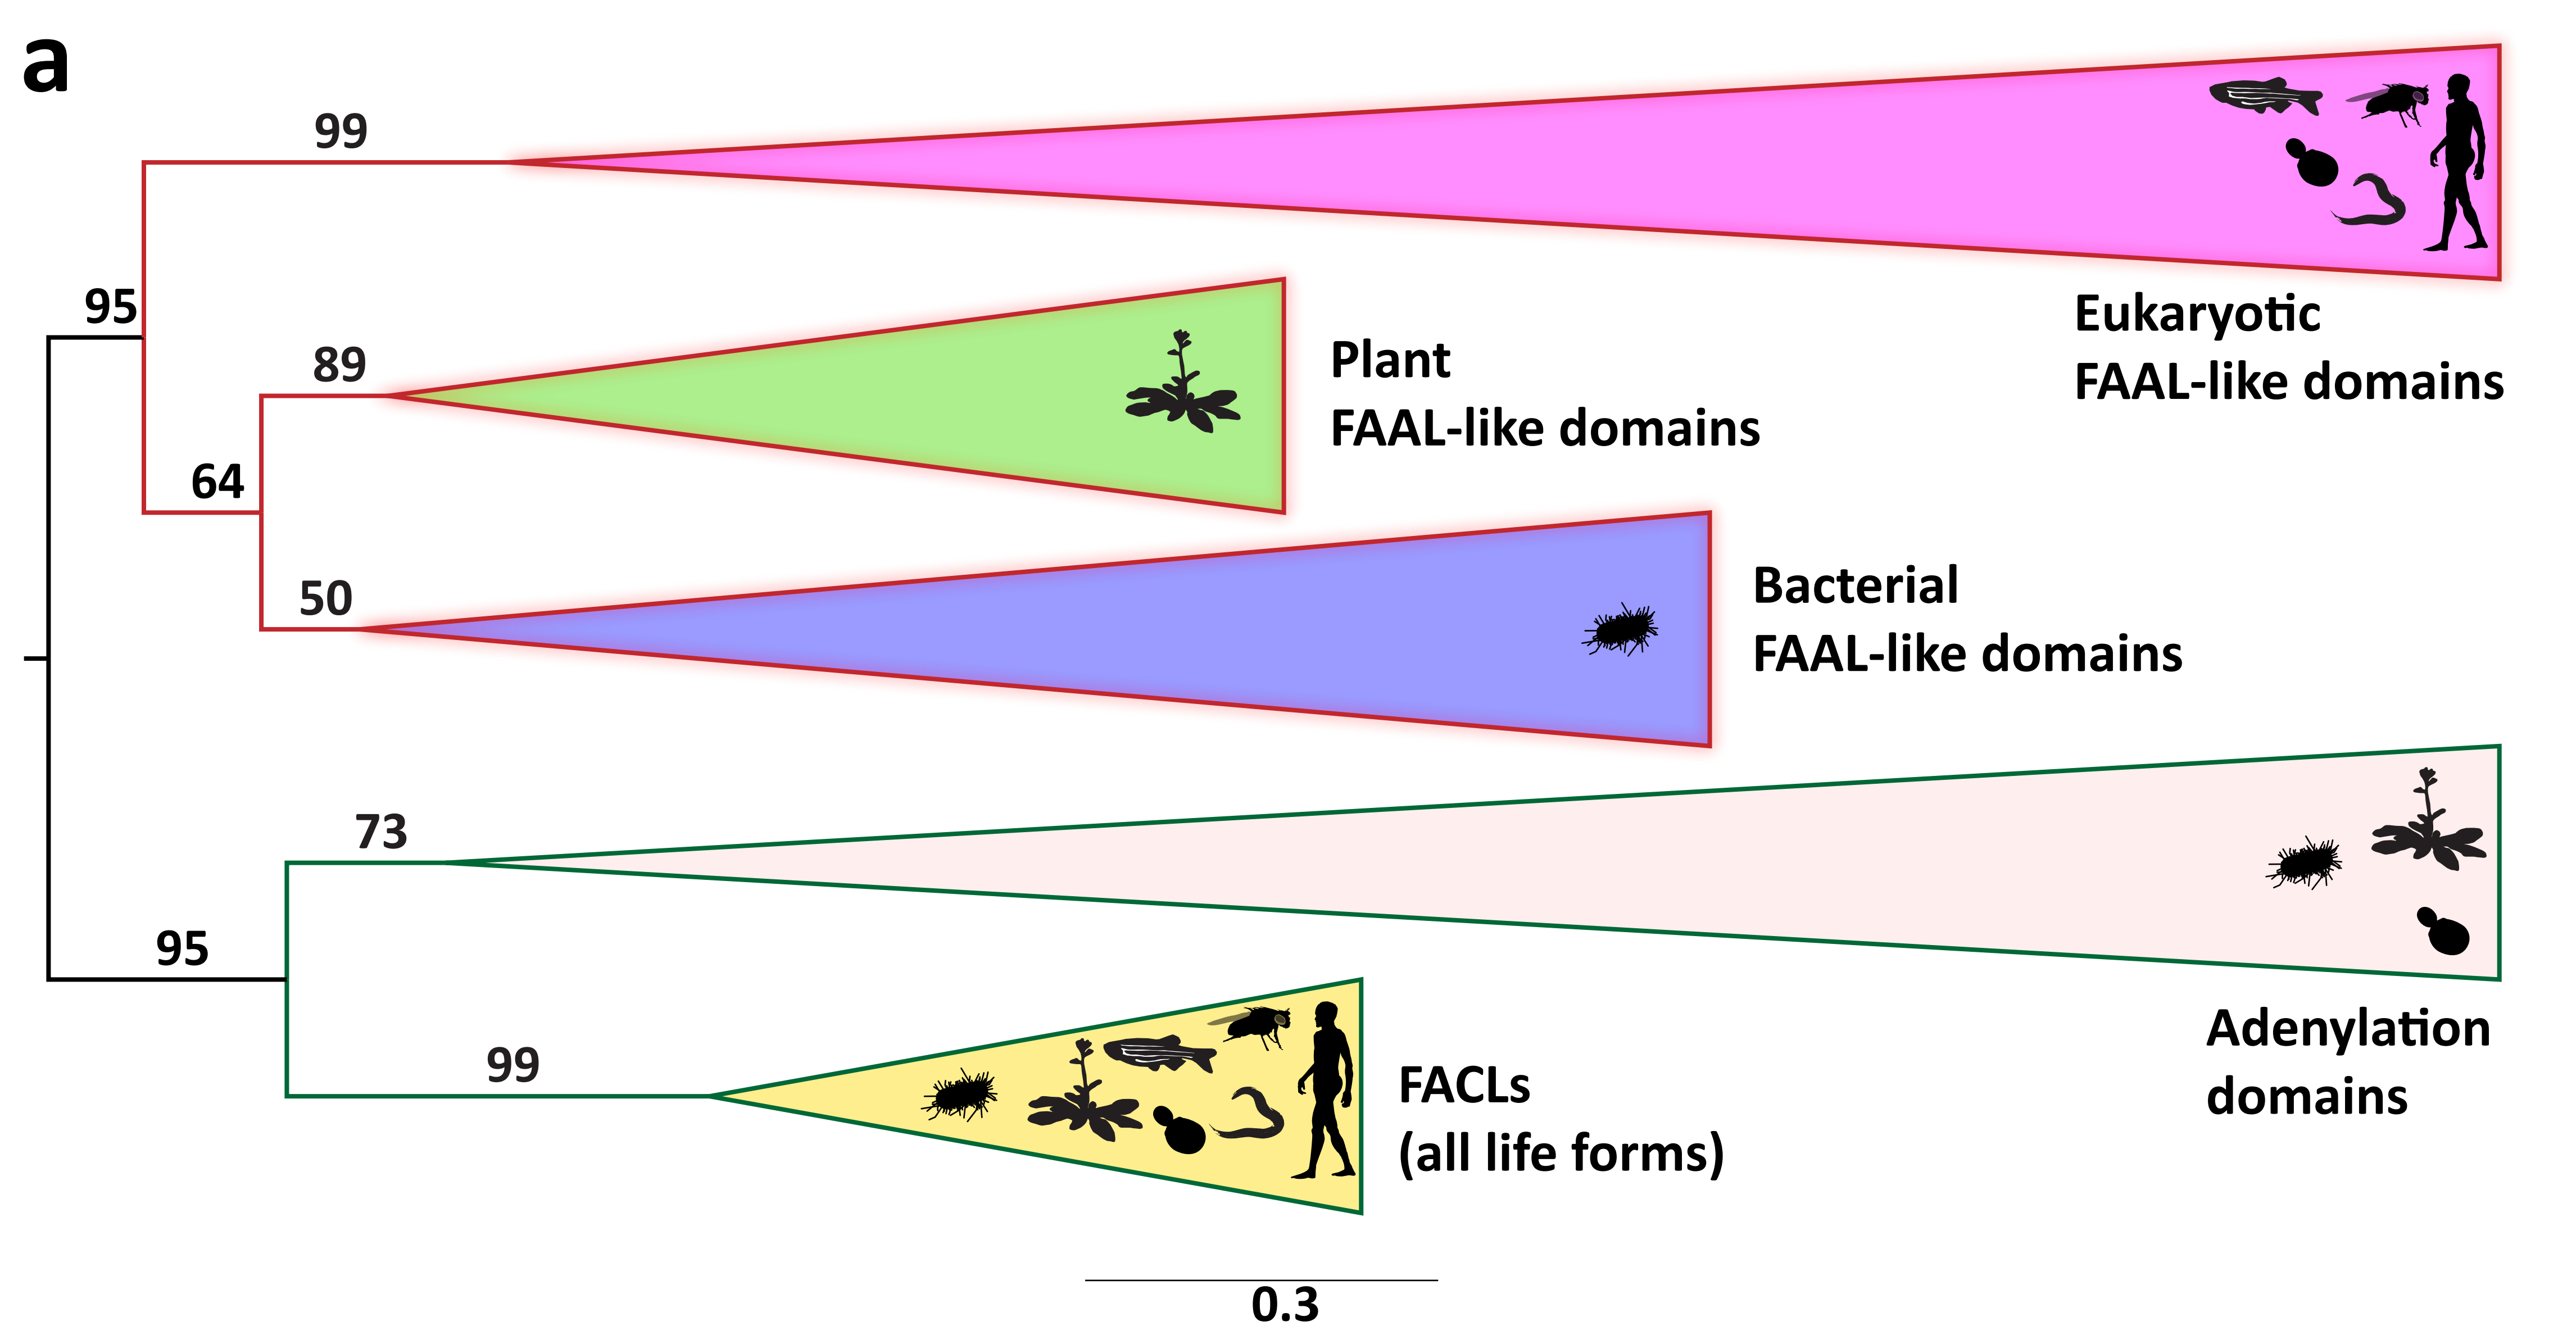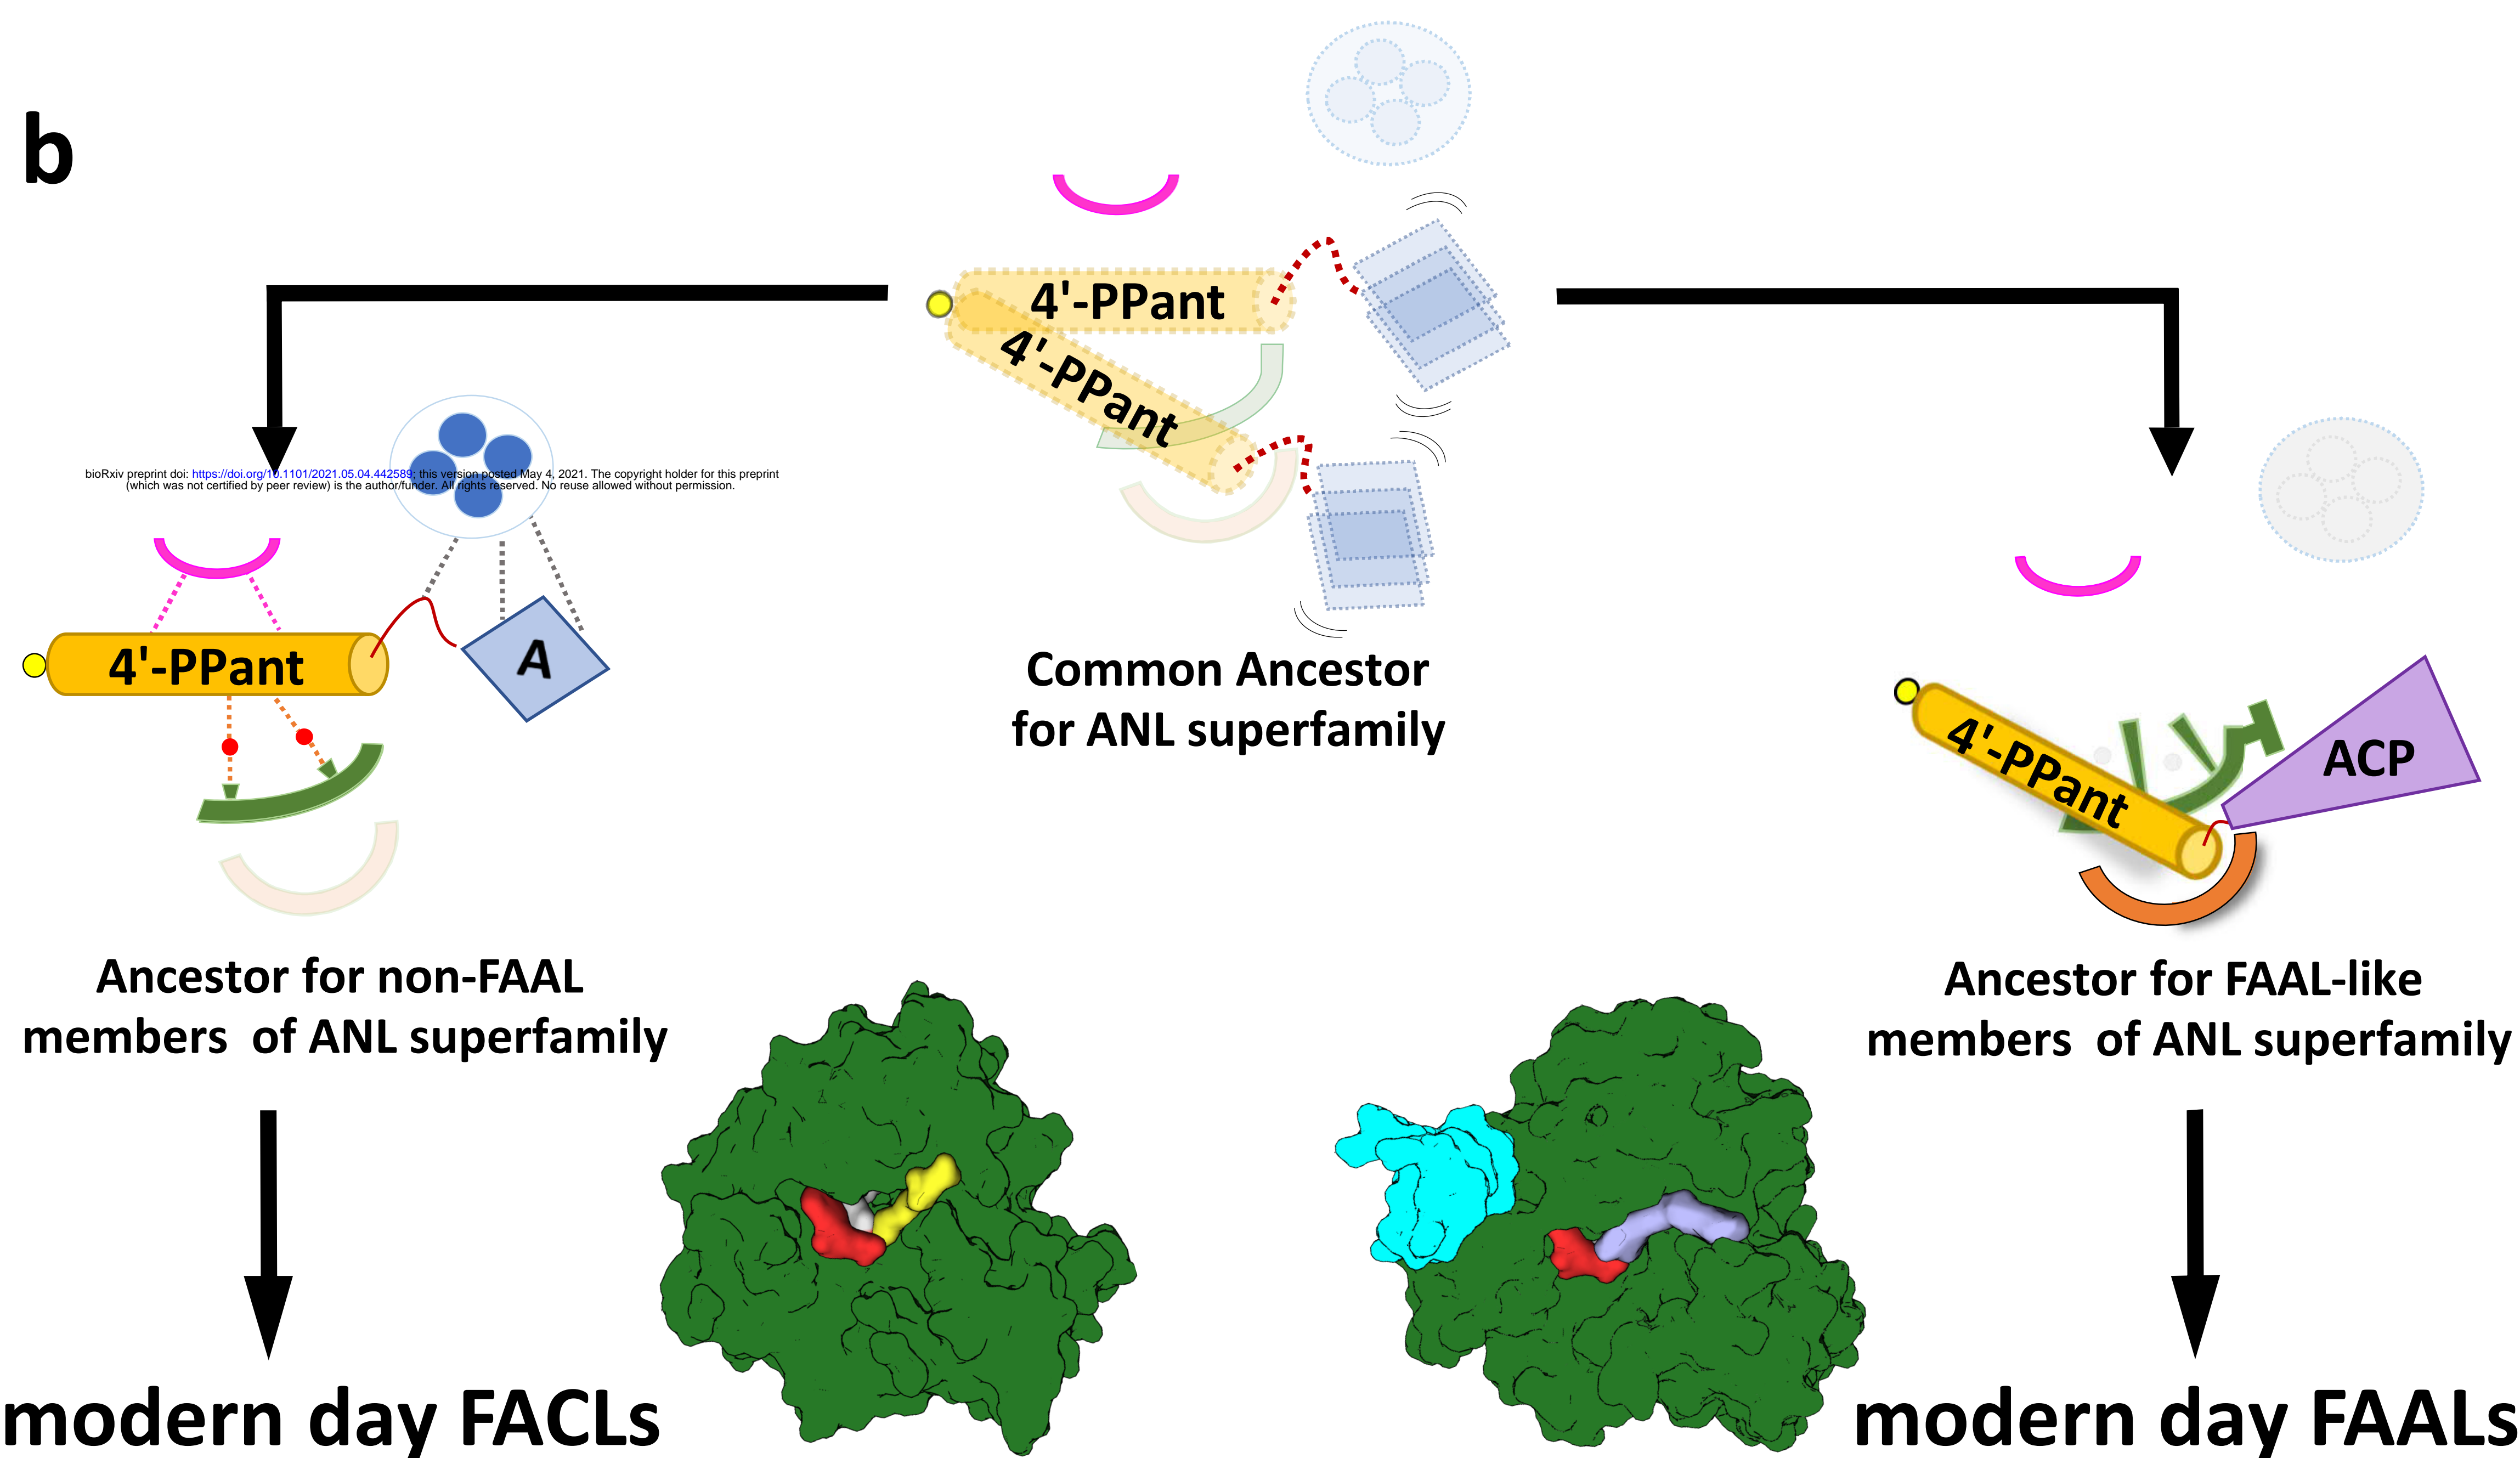

629 **Figure-6: The CoA-rejection elements in FAALs are conserved in all forms of life and therefore, FAALs**  
630 **and FACLs have parallely evolved from a common ancestor of the ANL superfamily: (a)** A clustering  
631 diagram with the bootstrapping values for all the FAAL-like sequences is presented. The ANL  
632 superfamily members have two major divergent classes, viz., CoA-rejecting FAAL-like sequences and  
633 CoA-accepting non-FAAL members (FACLs and A-domains). A graphical representation of the  
634 distribution of these members is shown using pictorial representation of the organisms, which include  
635 bacteria, plants, yeast, worm, fly and human. **(b)** The ancestral fold of the ANL superfamily may have  
636 been a loose organisation of peptide scaffolds working with thiol-containing molecules such as  
637 pantetheine, etc. The ancestral fold accumulated various mutations resulting into the ancestor of  
638 modern-day acceptor-promiscuity lacking FAAL-like forms and acceptor-promiscuity containing non-  
639 FAAL members. The evolution of acceptor-promiscuity spectrum may have been driven based on their  
640 participation in bulk metabolic reactions. FAALs did not participate in bulk metabolic reactions and  
641 hence dedicated themselves to their cognate ACP partners to redirect small molecules to specific  
642 pathways. The non-FAAL members of the ANL superfamily such as FACLs participate in bulk reactions,  
643 where minor cross-reaction products are observed.
